# Supplementary material for: Synthesis of spiro-tetrahydrothiopyran-oxindoles by Michael–aldol cascade reactions: discovery of potential P53-MDM2 inhibitors with good antitumor activity
Source: Royal Society of Chemistry journal article supplement (doi:10.1039/c7ob02726e), 2017-12-21
Supplement: c7ob02726e1.pdf [file c7ob02726e1.pdf]

## Supplementary Material

### Synthesis of Spiro-tetrahydrothiopyran-oxindoles by Michael-aldol Cascade Reactions: Discovery of Potent P53-MDM2 Inhibitors with Good Antitumor Activity

Shengzheng Wang<sup>a,†,\*</sup>, Shuqiang Chen<sup>b,†</sup>, Zhongjie Guo<sup>a,†</sup>, Shipeng He<sup>b</sup>, Fan Zhang<sup>a</sup>, Xueying Liu<sup>a</sup>, Weiping Chen<sup>a</sup>, Shengyong Zhang<sup>a</sup> and Chunquan Sheng<sup>b,\*</sup>

*a* Department of Medicinal Chemistry, School of Pharmacy, Fourth Military Medical University, 169 Changle West Road, Xi'an, 710032, P.R. China

*b* Department of Medicinal Chemistry, School of Pharmacy, Second Military Medical University, 325 Guohe Road, Shanghai 200433, People's Republic of China

#### Table of Contents

|                                                                                                                                  |     |
|----------------------------------------------------------------------------------------------------------------------------------|-----|
| 1. X-ray structure of compound <b>3a</b>                                                                                         | S2  |
| 2. Schematic representation of the proposed binding mode for compounds <b>3m</b> and <b>3n</b> in the p53 binding domain of MDM2 | S3  |
| 3. NMR Spectra                                                                                                                   | S4  |
| 4. HPLC Profile for compound <b>3a</b>                                                                                           | S27 |

## X-ray structure of compound 3a

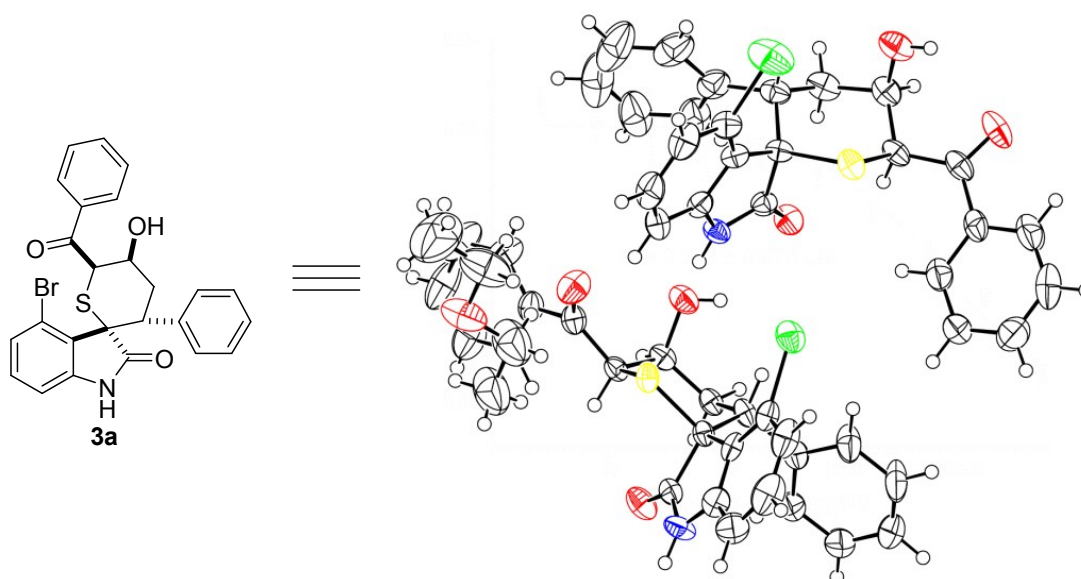

Bond precision: C-C = 0.0105 Å

Wavelength=0.71073

Cell: a=12.813 (2) b=14.490 (2) c=16.225 (4)  
 alpha=108.147 (3) beta=98.120 (4) gamma=116.118 (2)  
 Temperature: 243 K

|                        | Calculated                                                                                   | Reported                                                 |
|------------------------|----------------------------------------------------------------------------------------------|----------------------------------------------------------|
| Volume                 | 2429.6 (8)                                                                                   | 2429.5 (8)                                               |
| Space group            | P -1                                                                                         | P-1                                                      |
| Hall group             | -P 1                                                                                         | ?                                                        |
| Moiety formula         | 2(C <sub>25</sub> H <sub>20</sub> Br N O <sub>3</sub> S), C <sub>4</sub> H <sub>10</sub> O   | ?                                                        |
| Sum formula            | C <sub>54</sub> H <sub>50</sub> Br <sub>2</sub> N <sub>2</sub> O <sub>7</sub> S <sub>2</sub> | C <sub>27</sub> H <sub>25</sub> Br N O <sub>3.50</sub> S |
| Mr                     | 1062.90                                                                                      | 531.45                                                   |
| Dx, g cm <sup>-3</sup> | 1.453                                                                                        | 1.453                                                    |
| Z                      | 2                                                                                            | 4                                                        |
| Mu (mm <sup>-1</sup> ) | 1.810                                                                                        | 1.810                                                    |
| F <sub>000</sub>       | 1092.0                                                                                       | 1092.0                                                   |
| F <sub>000</sub> '     | 1091.77                                                                                      |                                                          |
| h, k, lmax             | 15, 17, 20                                                                                   | 15, 17, 20                                               |
| Nref                   | 9634                                                                                         | 9479                                                     |
| Tmin, Tmax             | 0.840, 0.881                                                                                 | 0.737, 0.884                                             |
| Tmin'                  | 0.722                                                                                        |                                                          |

Correction method= MULTI-SCAN

Data completeness= 0.984

Theta(max)= 26.100

R(reflections)= 0.0572 ( 5961)

wR2(reflections)= 0.1788 ( 9479)

S = 1.046

Npar= 606

**Schematic representation of the proposed binding mode for compounds 3m and 3n in the p53 binding domain of MDM2.**

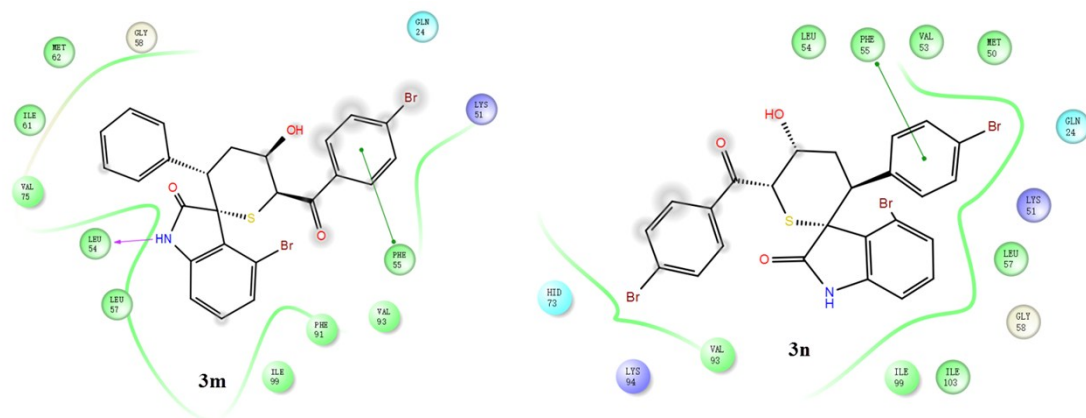

NMR Spectra  
Compound 3a

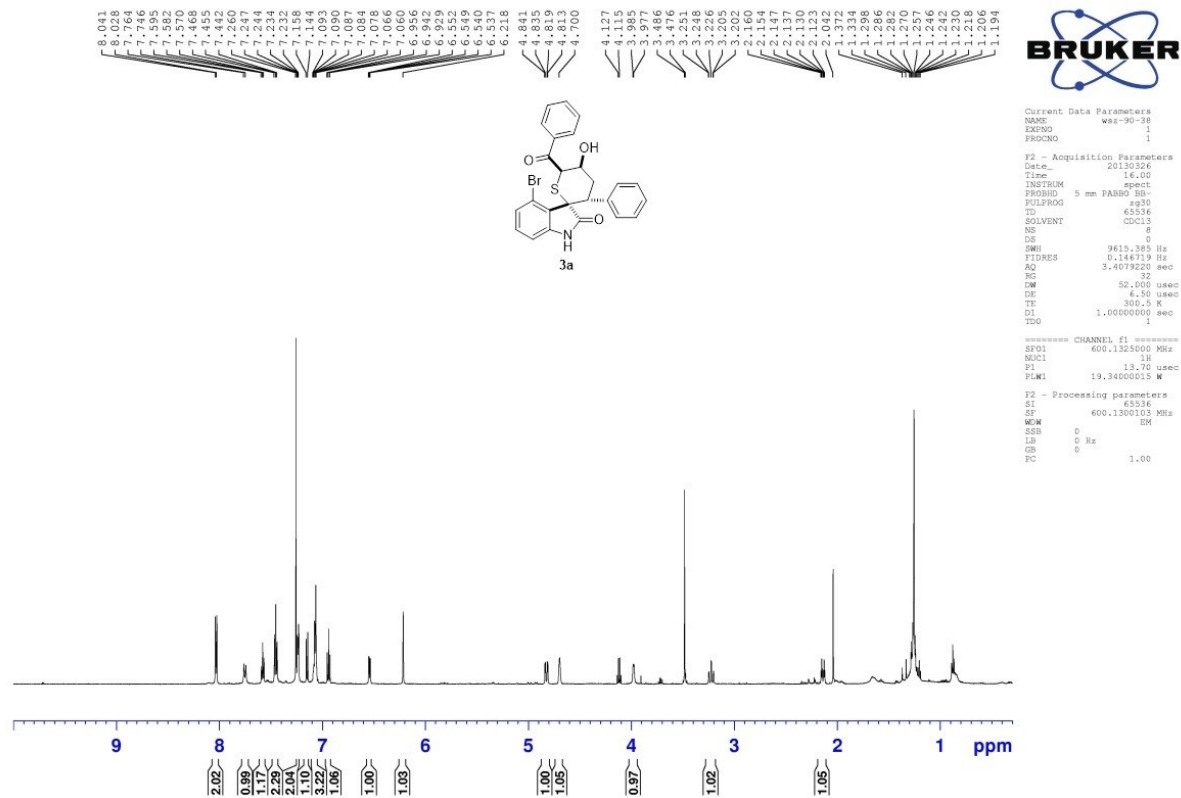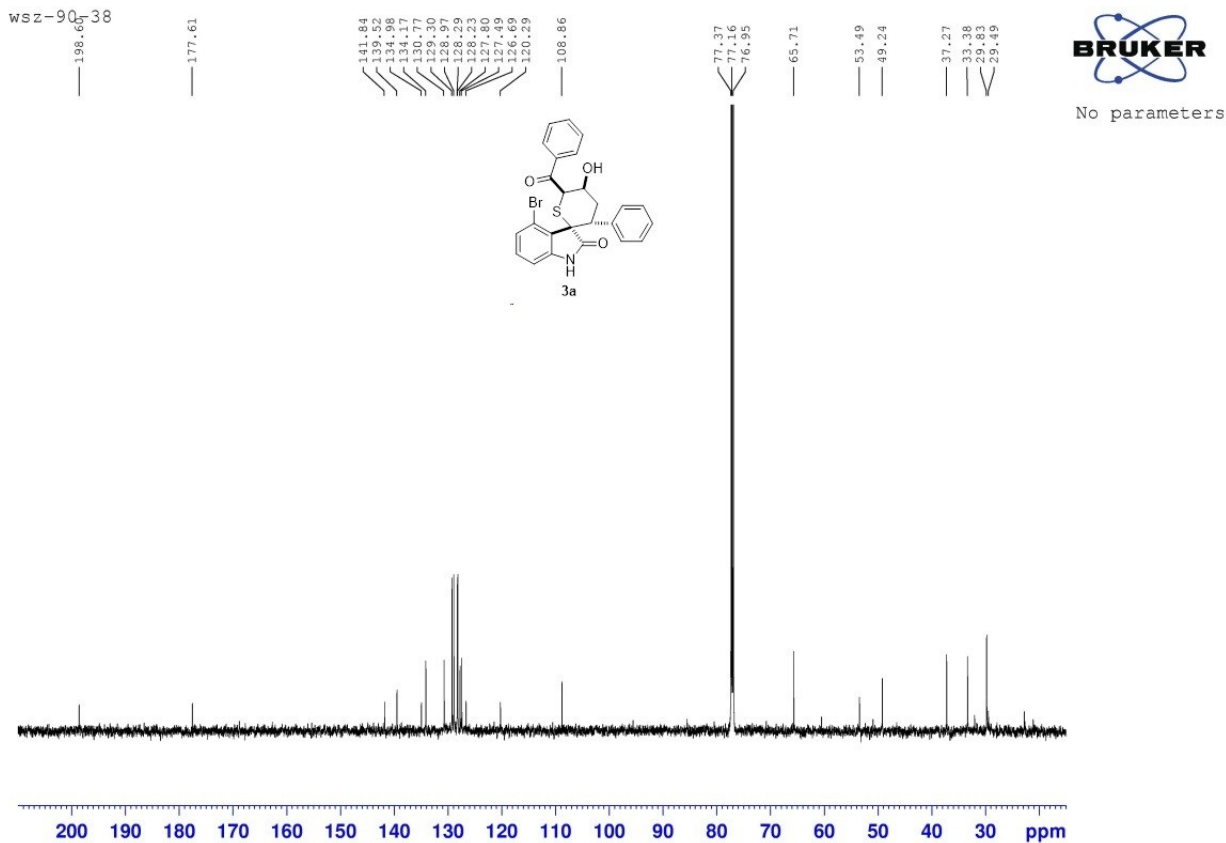

# Compound 3b

wsz-5-57-1

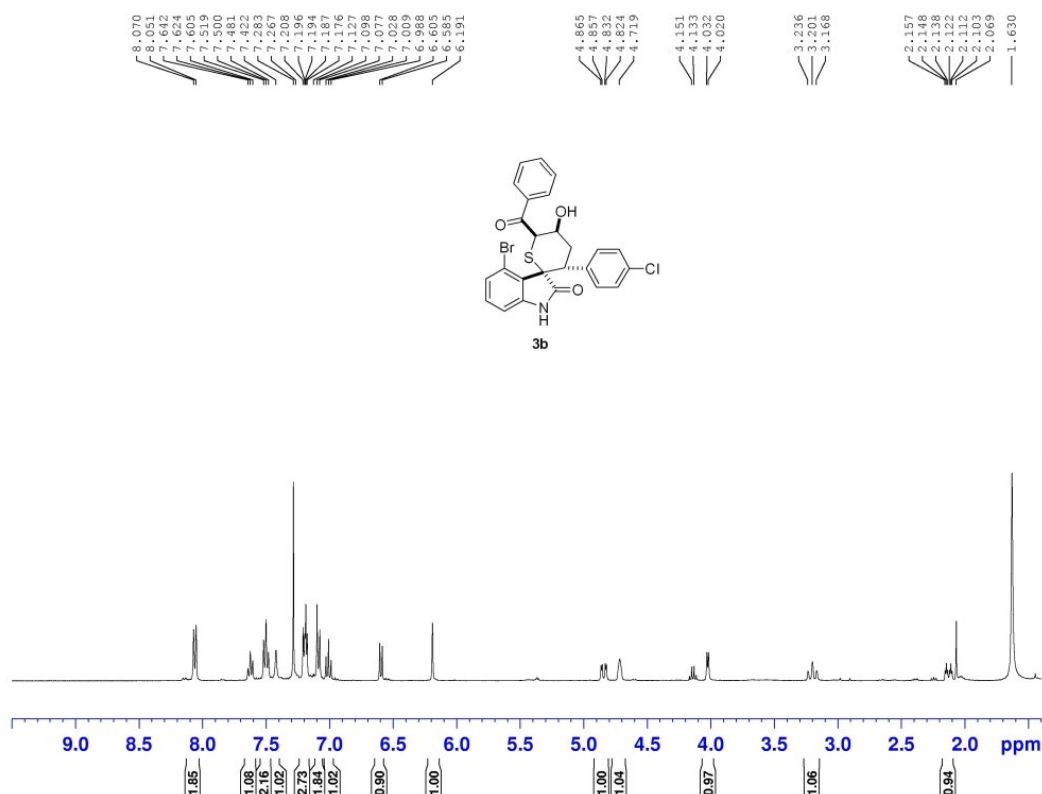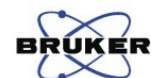

Current Data Parameters  
NAME: wsz-5-57-1  
EXPNO: 1  
PROCNO: 1

F2 - Acquisition Parameters  
Date\_: 20170826  
Time: 15.20  
INSTRUM: spect  
PROBHD: 5 mm PABBO BB/  
PULPROG: zg30  
TD: 65536  
SOLVENT: CDCl3  
NS: 16  
DS: 2  
SWH: 8223.685 Hz  
FIDRES: 0.125493 Hz  
AQ: 3.9846387 sec  
RG: 107.77  
DM: 60.800 usec  
DE: 6.50 usec  
TE: 292.0 K  
D1: 1.0000000 sec  
TDO: 1

===== CHANNEL f1 =====  
NUC1: 1H  
P1: 10.00 usec  
PLW1: 17.7630095 W  
SFO1: 400.1326710 MHz

F2 - Processing parameters  
SI: 65536  
SF: 400.1300000 MHz  
WDW: EM  
SSB: 0  
LB: 0.30 Hz  
GB: 0  
PC: 1.00

wsz-2-49-2

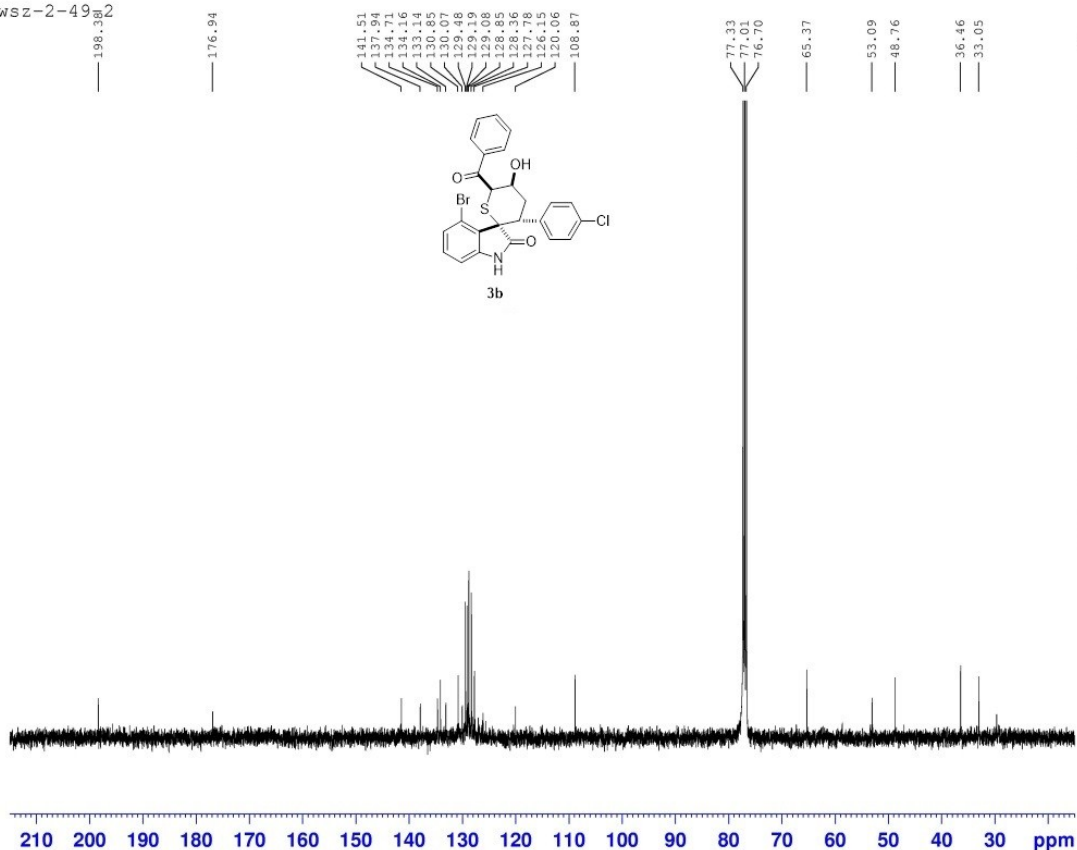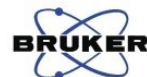

Current Data Parameters  
NAME: wsz-2-49-2  
EXPNO: 2  
PROCNO: 1

F2 - Acquisition Parameters  
Date\_: 20161009  
Time: 12.07  
INSTRUM: spect  
PROBHD: 5 mm PABBO BB/  
PULPROG: zgpg30  
TD: 65536  
SOLVENT: CDCl3  
NS: 2048  
DS: 4  
SWH: 24038.461 Hz  
FIDRES: 9.360790 Hz  
AQ: 1.3631988 sec  
RG: 107.77  
DM: 20.800 usec  
DE: 6.50 usec  
TE: 0 K  
D1: 2.0000000 sec  
D11: 0.0300000 sec  
TDO: 2

===== CHANNEL f1 =====  
NUC1: 13C  
P1: 10.00 usec  
PLW1: 71.3449983 W  
SFO1: 100.6229293 MHz

===== CHANNEL f2 =====  
CPDPRG2: waltz16  
NUC2: 1H  
PCPD2: 90.00 usec  
PLW2: 17.7630095 W  
PLW3: 0.25134000 W  
PLW3: 0.20366000 W  
SFO2: 400.1314600 MHz

F2 - Processing parameters  
SI: 32768  
SF: 100.6127490 MHz  
WDW: EM  
SSB: 0  
LB: 1.00 Hz  
GB: 0  
PC: 1.40

# Compound 3c

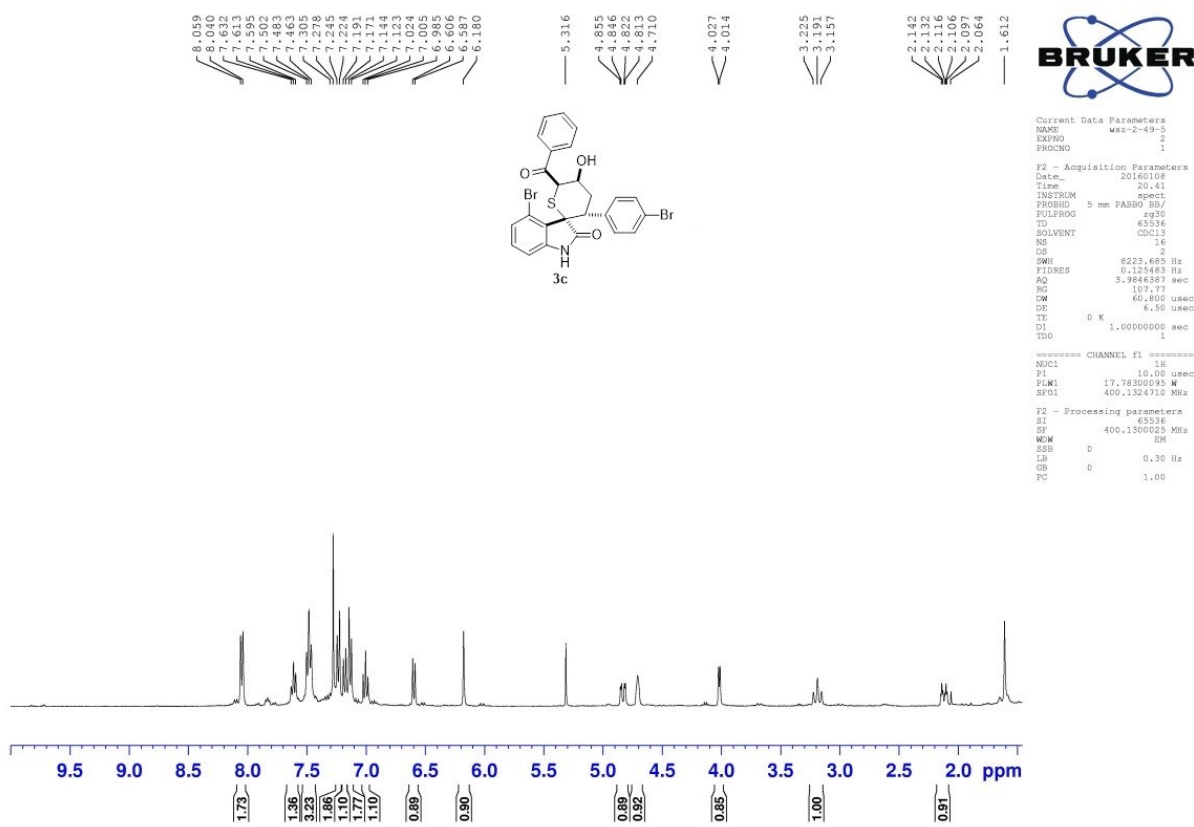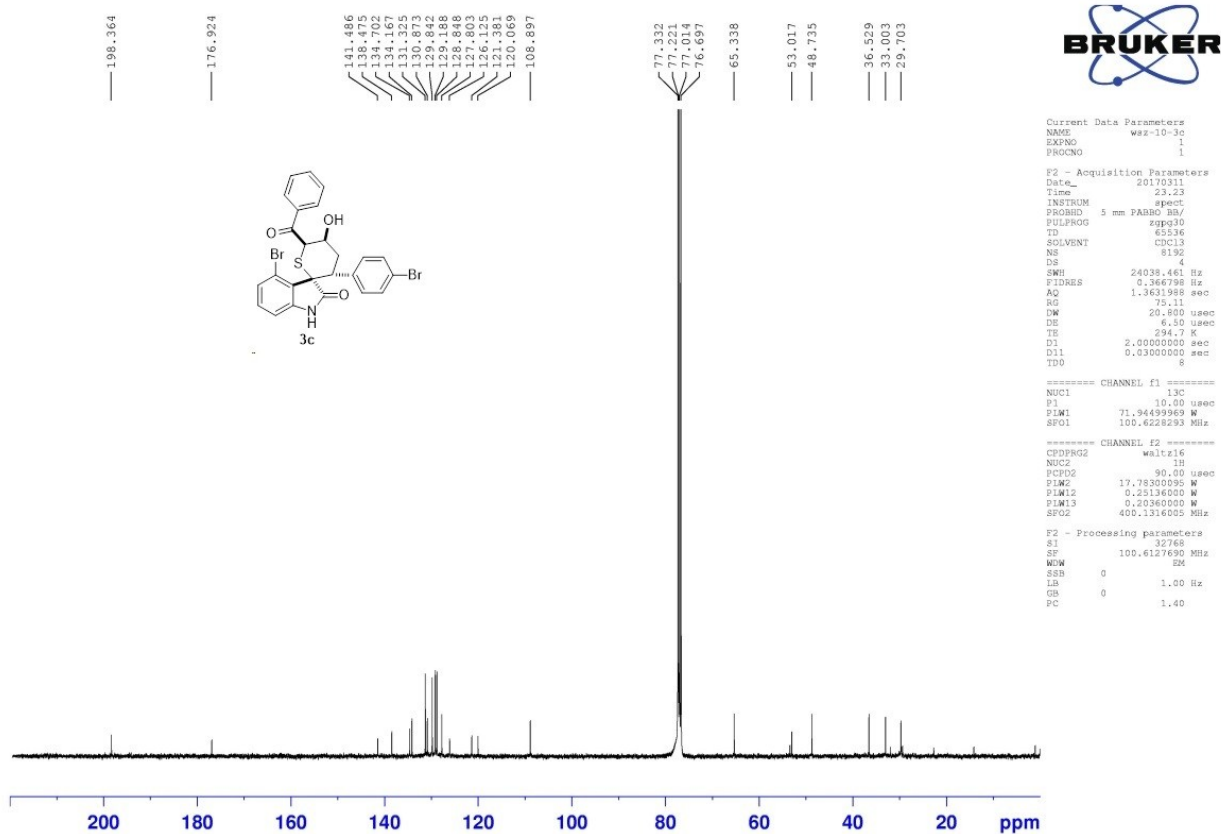

# Compound 3d

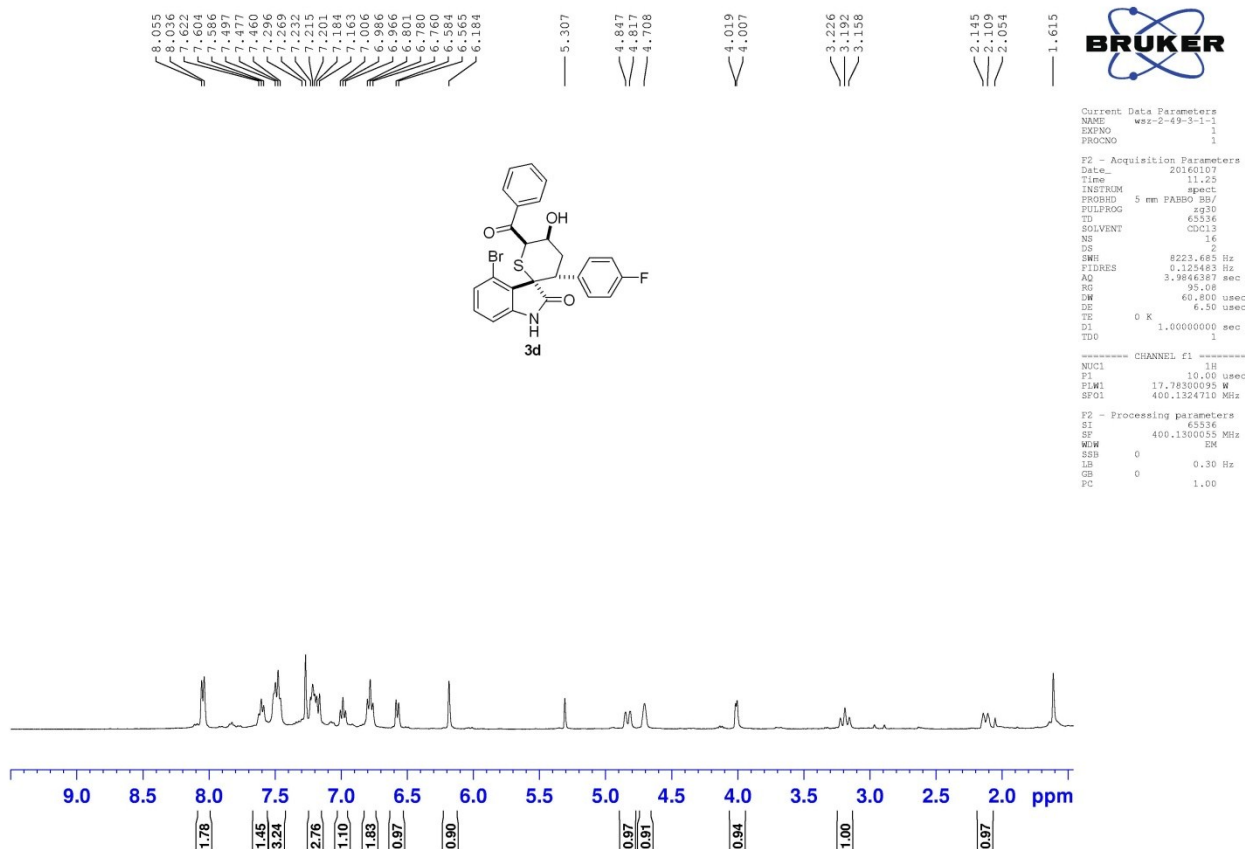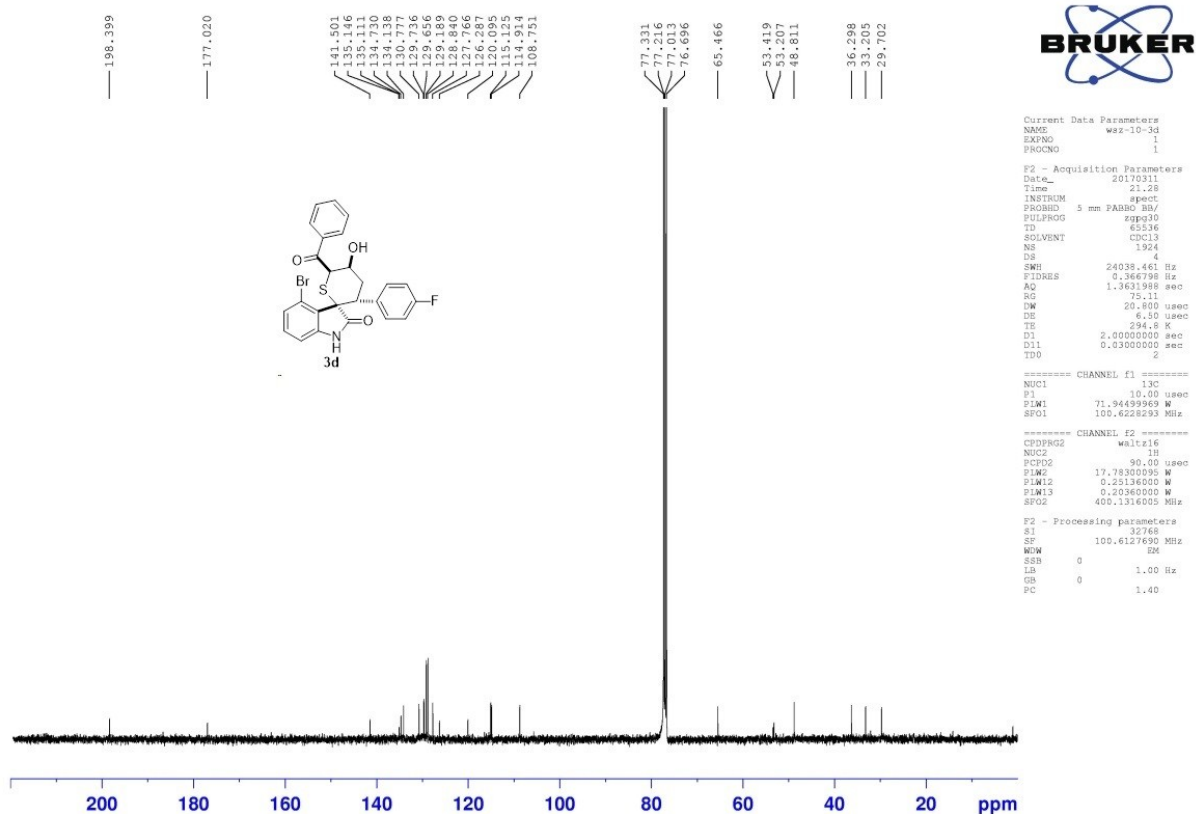

# Compound 3e

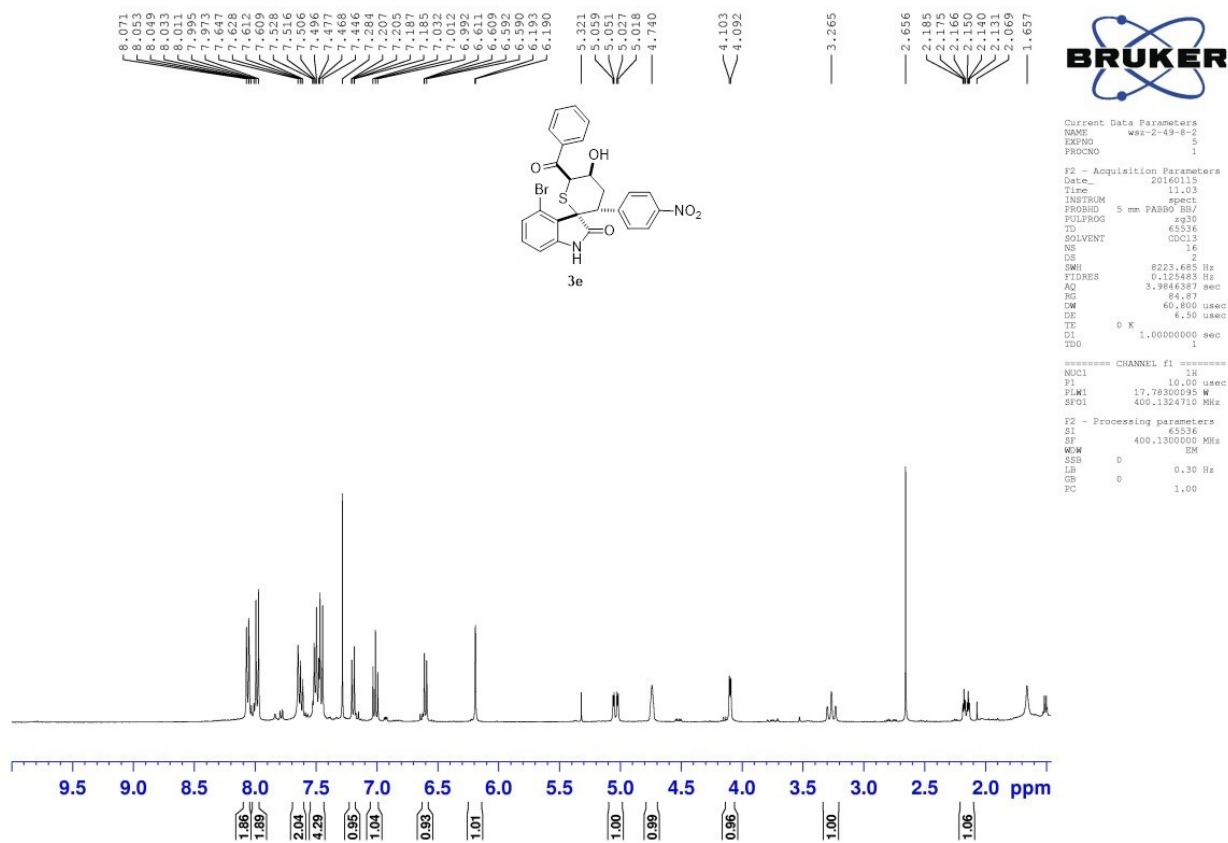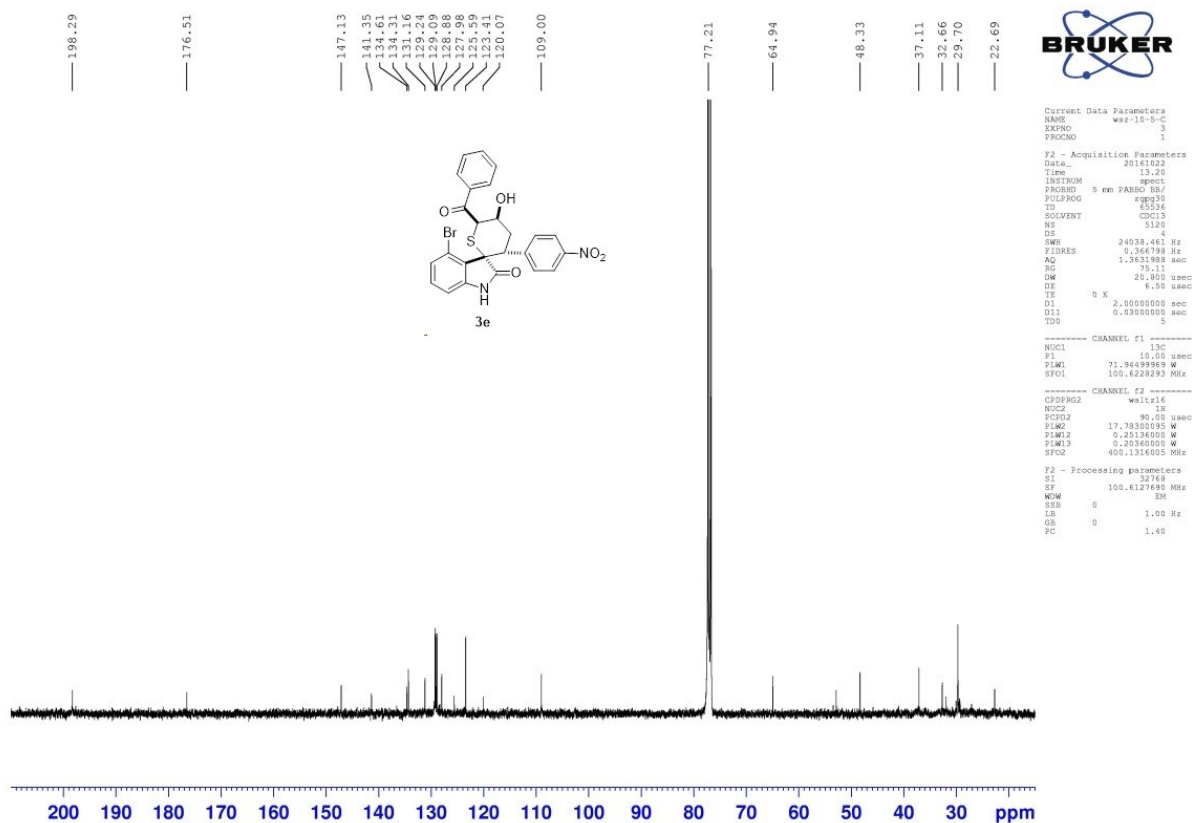



# Compound 3f

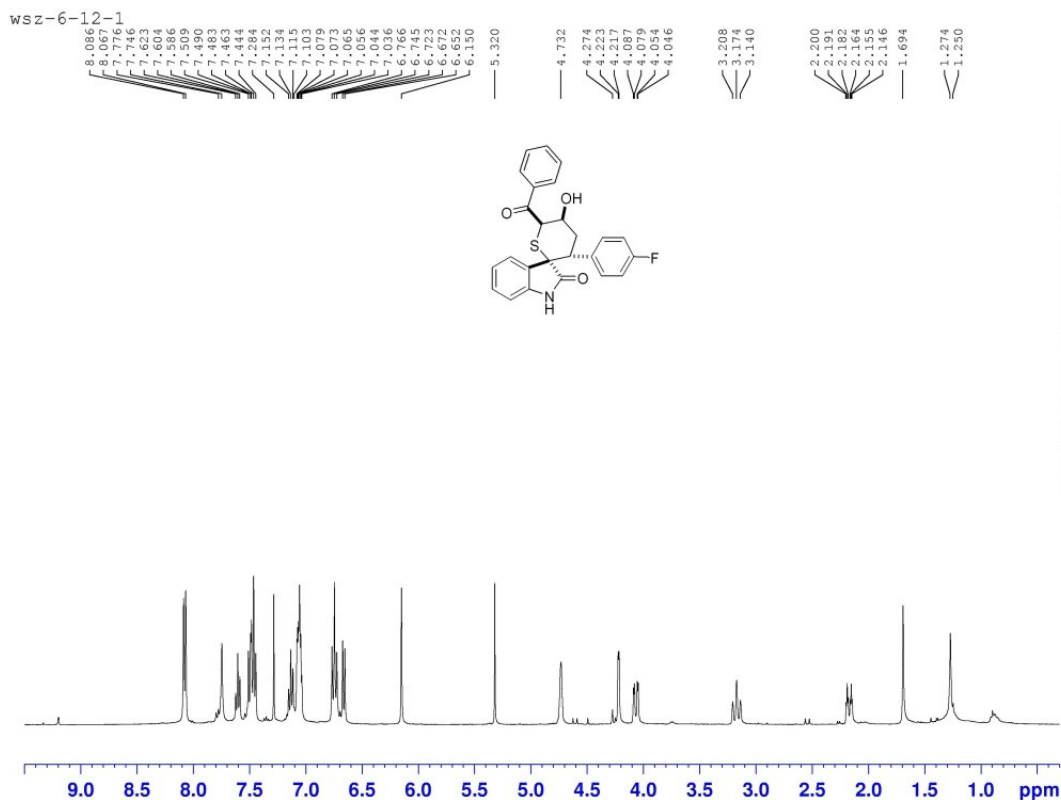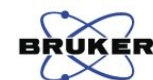

Current Data Parameters  
NAME wsz-6-12-1  
EXPNO 1  
PROCNO 1

F2 - Acquisition Parameters  
Date\_ 20171012  
Time 16.00  
INSTRUM spect  
PROBHD 5 mm F4BBO BB/  
PULPROG zg30  
TD 65536  
SOLVENT CDCl3  
NS 16  
DS 2  
SWH 8223.685 Hz  
FIDRES 0.125483 Hz  
AQ 3.984387 sec  
RG 84.87  
DM 60.800 usec  
DE 6.50 usec  
TE 292.0 K  
D1 1.00000000 sec  
TDO 1

===== CHANNEL f1 =====  
NUC1 1H  
P1 10.00 usec  
PLW1 17.78300095 W  
SFO1 400.1324710 MHz

F2 - Processing parameters  
SI 65536  
SF 400.1300000 MHz  
WDW EM  
SSB 0  
LB 0.30 Hz  
GB 0  
PC 1.00

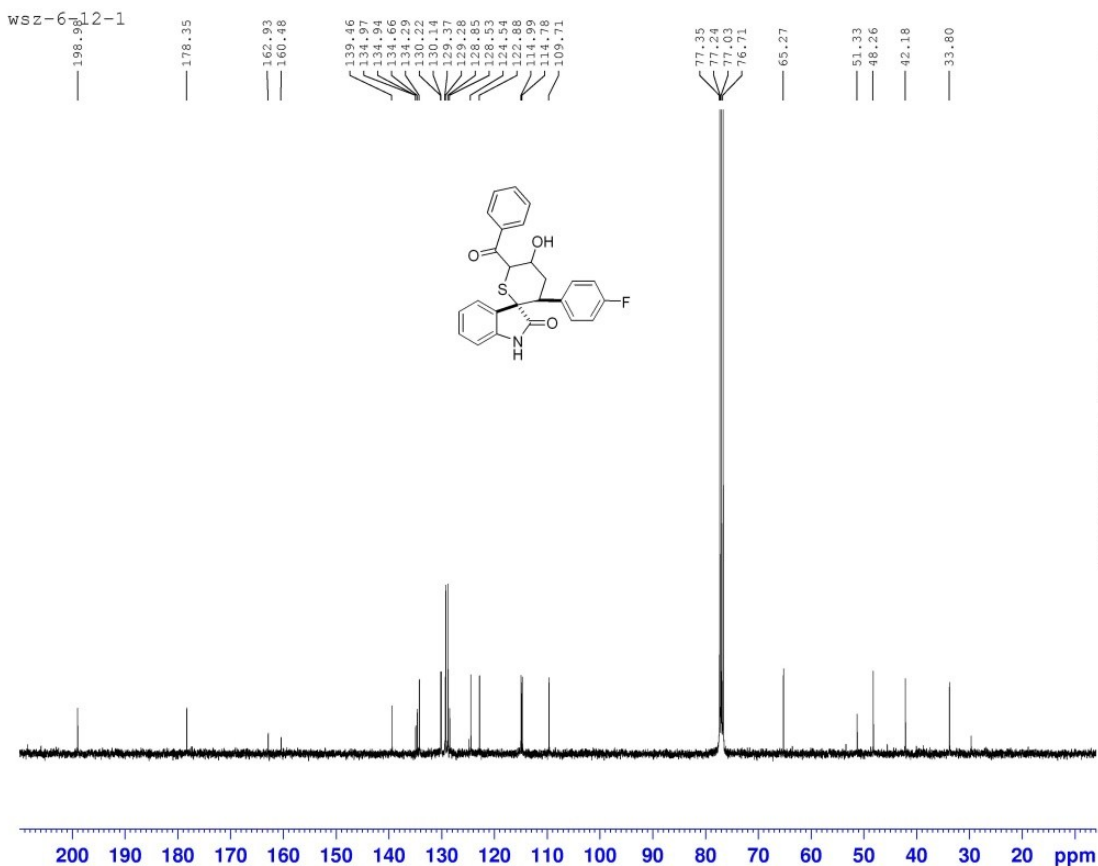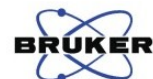

Current Data Parameters  
NAME wsz-6-12-1  
EXPNO 3  
PROCNO 1

F2 - Acquisition Parameters  
Date\_ 20171012  
Time 16.48  
INSTRUM spect  
PROBHD 5 mm F4BBO BB/  
PULPROG zgpg30  
TD 65536  
SOLVENT CDCl3  
NS 1032  
DS 4  
SWH 24038.461 Hz  
FIDRES 0.366798 Hz  
AQ 1.361986 sec  
RG 75.11  
DM 20.800 usec  
DE 6.50 usec  
TE 293.1 K  
D1 2.00000000 sec  
D11 0.03000000 sec  
TDO 6

===== CHANNEL f1 =====  
NUC1 13C  
P1 10.00 usec  
PLW1 71.34499969 W  
SFO1 100.6228293 MHz

===== CHANNEL f2 =====  
CPDPRG2 Maltz16  
NUC2 1H  
PCPDZ 80.00 usec  
PLW2 17.78300095 W  
PLW12 0.25136000 W  
PLW13 0.20360000 W  
SFO2 400.1316005 MHz

F2 - Processing parameters  
SI 32768  
SF 100.6127690 MHz  
WDW EM  
SSB 0  
LB 1.00 Hz  
GB 0  
PC 1.40

# Compound 3g

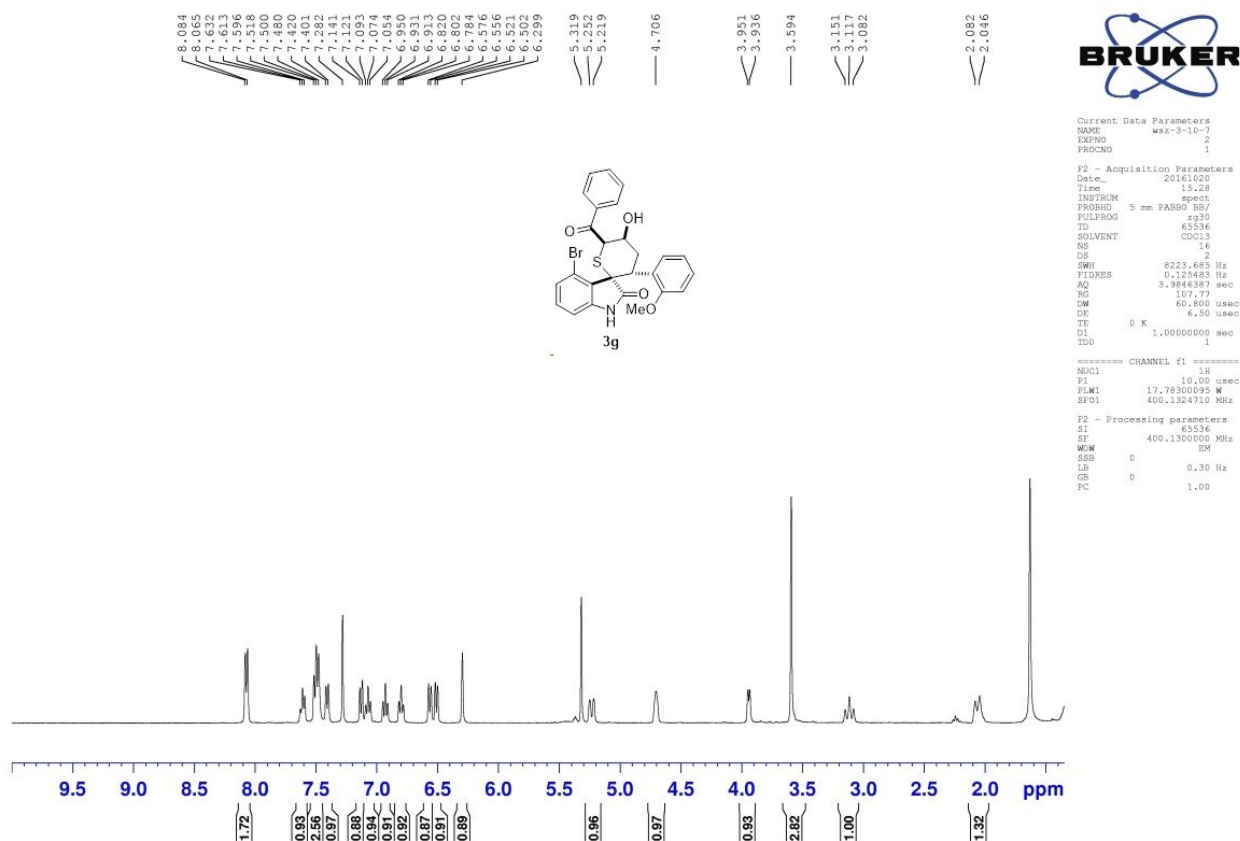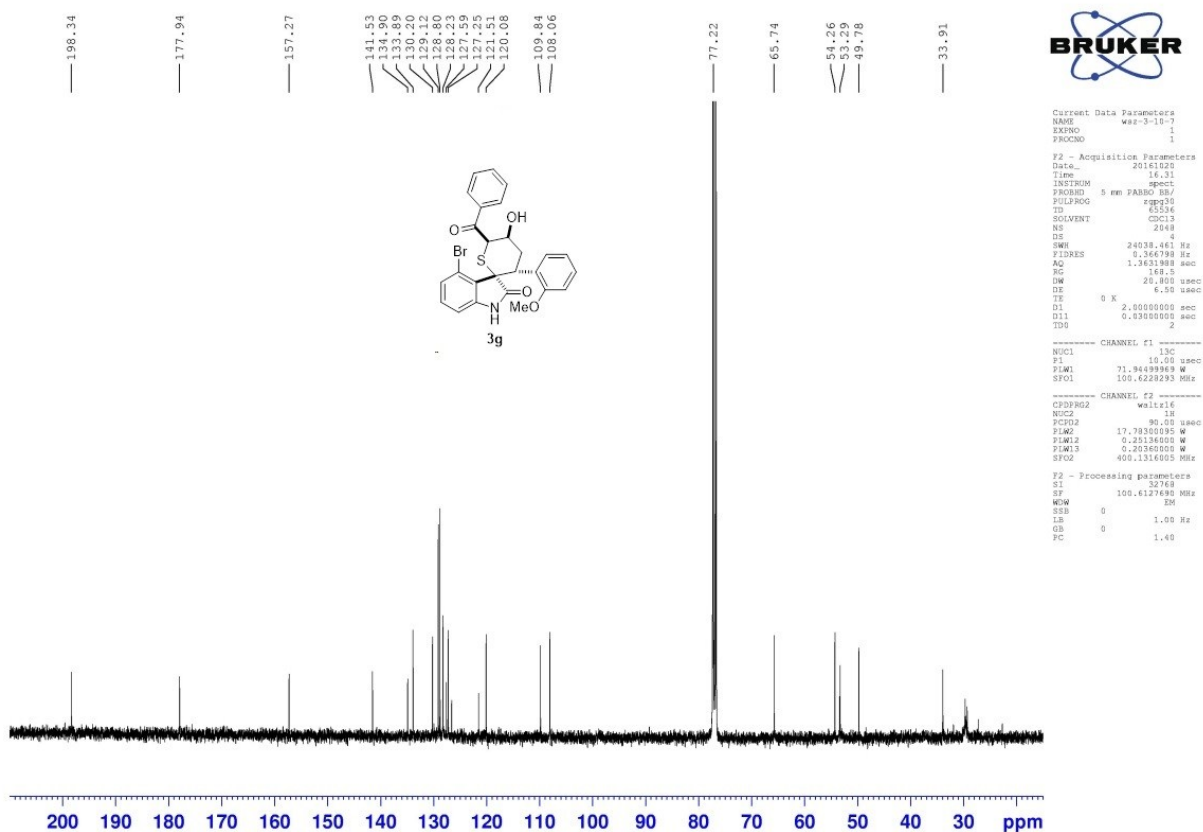

# Compound 3h

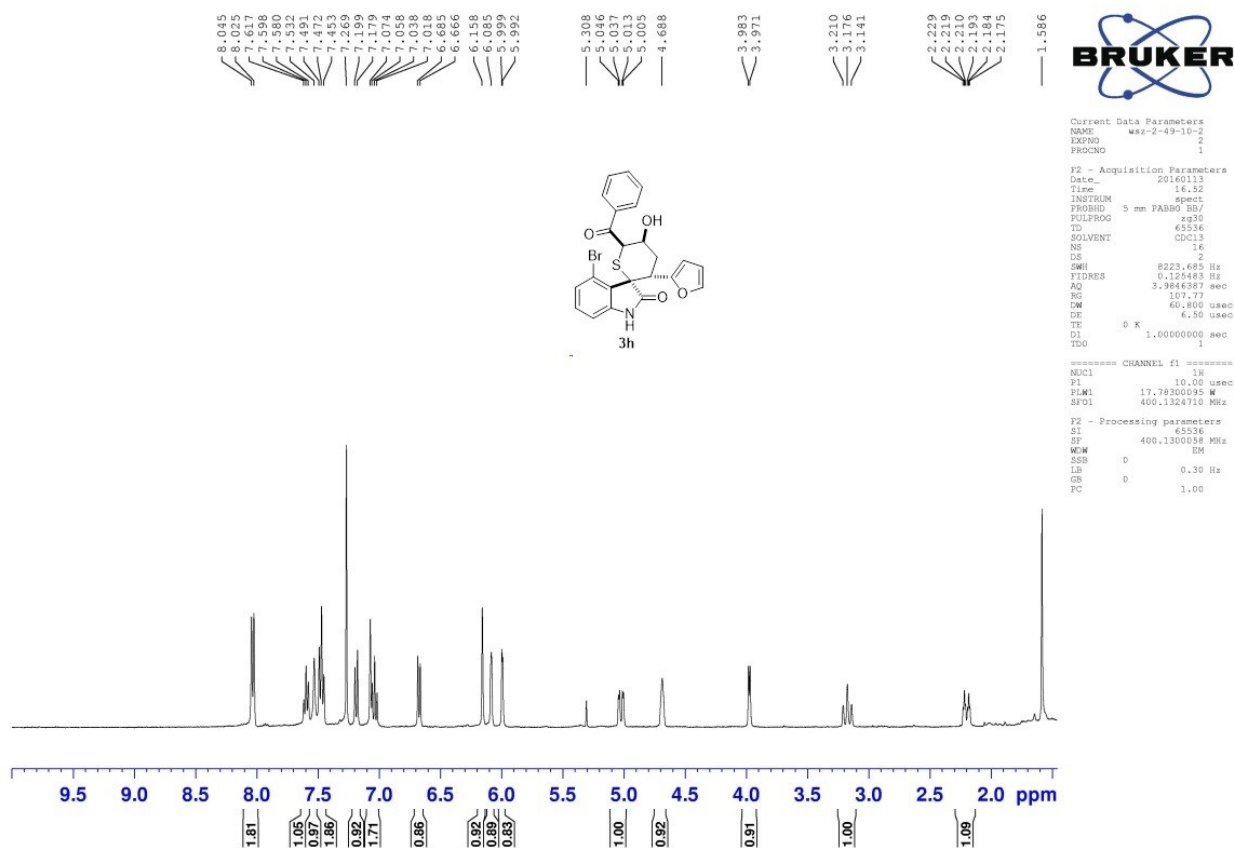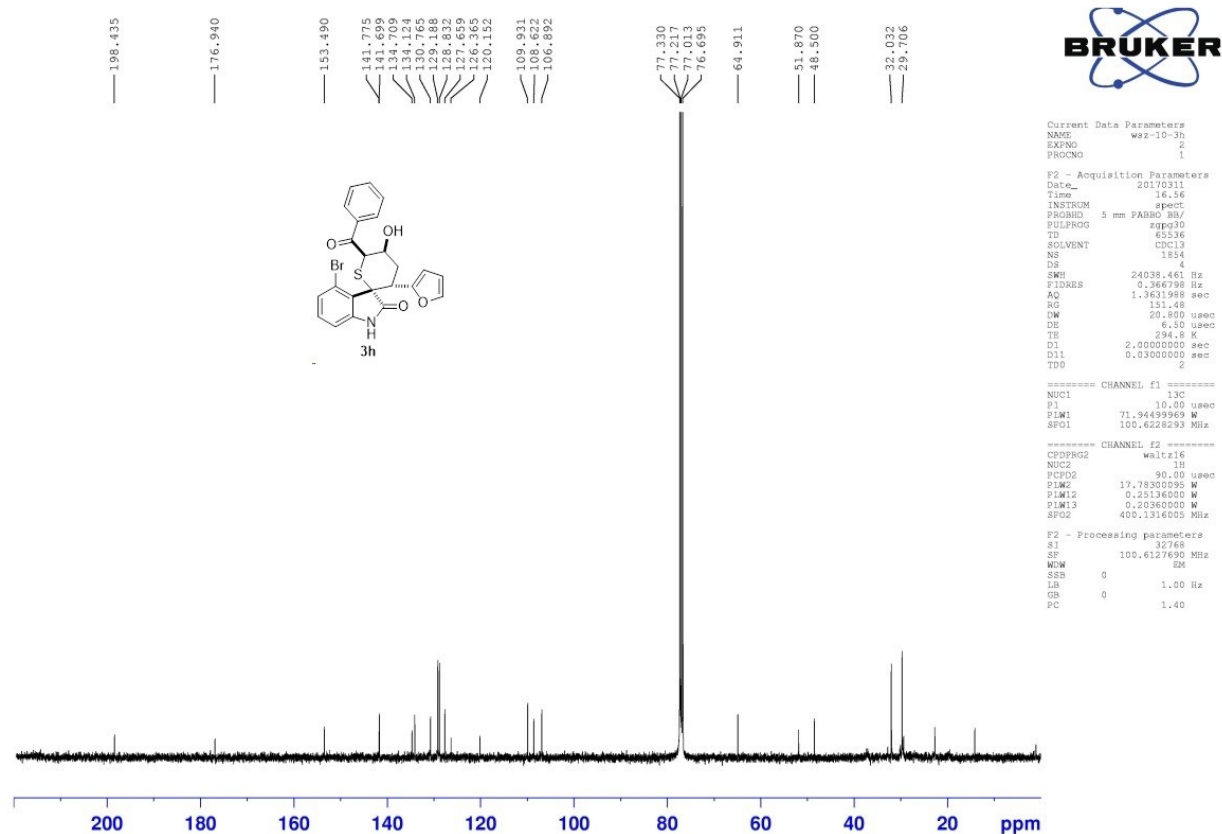

# Compound 3i

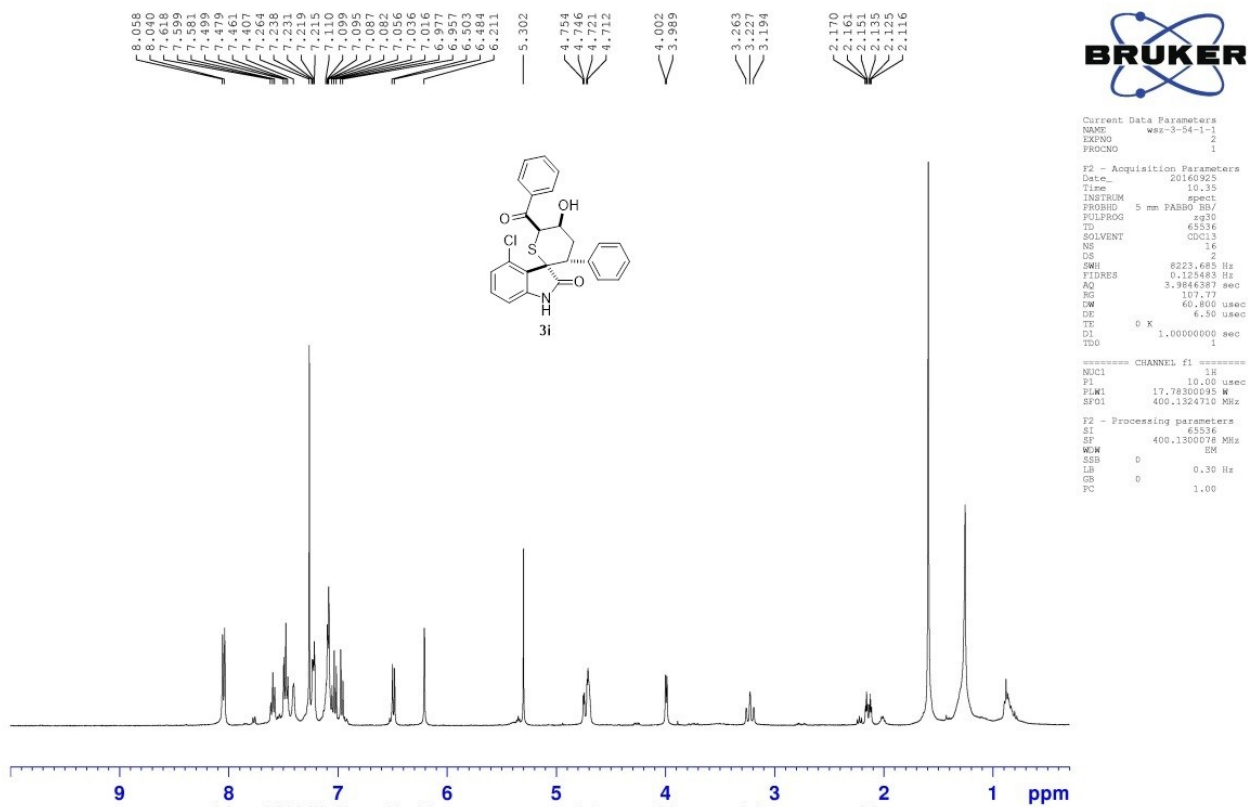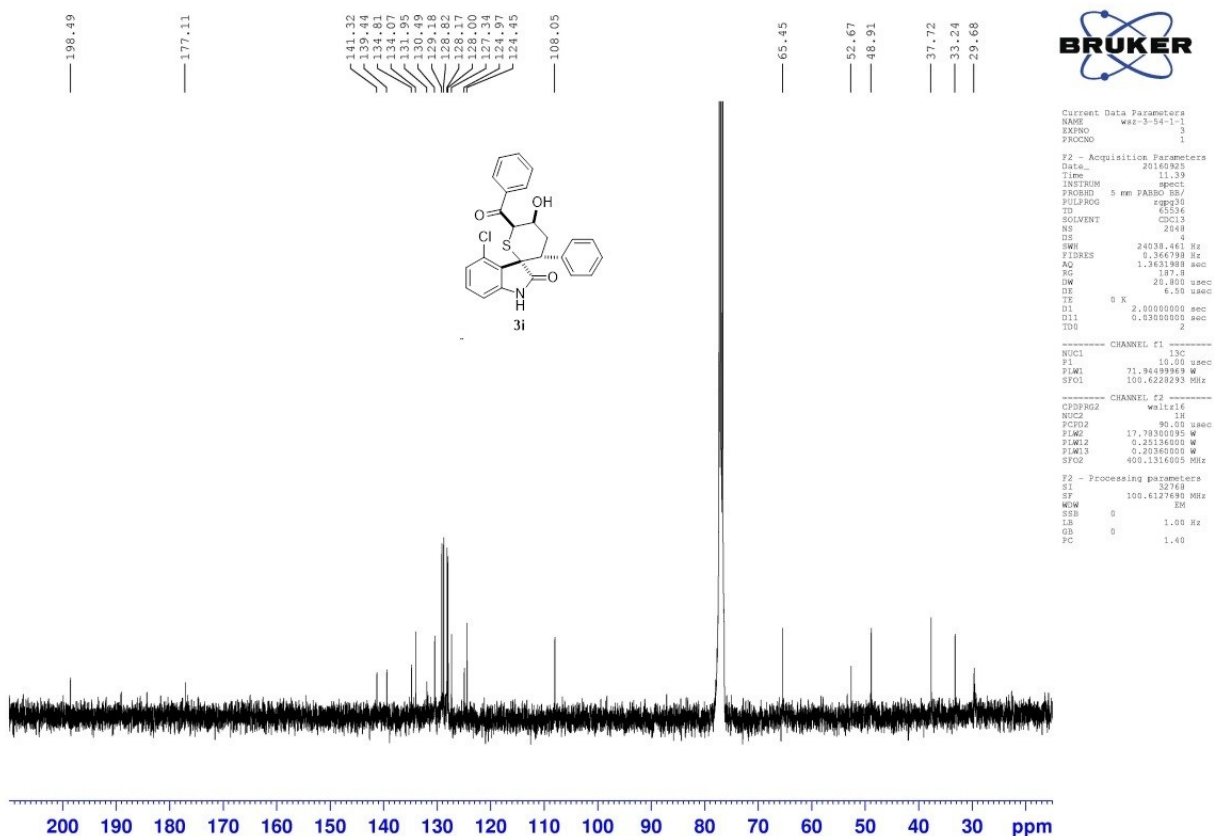

Compound 3j

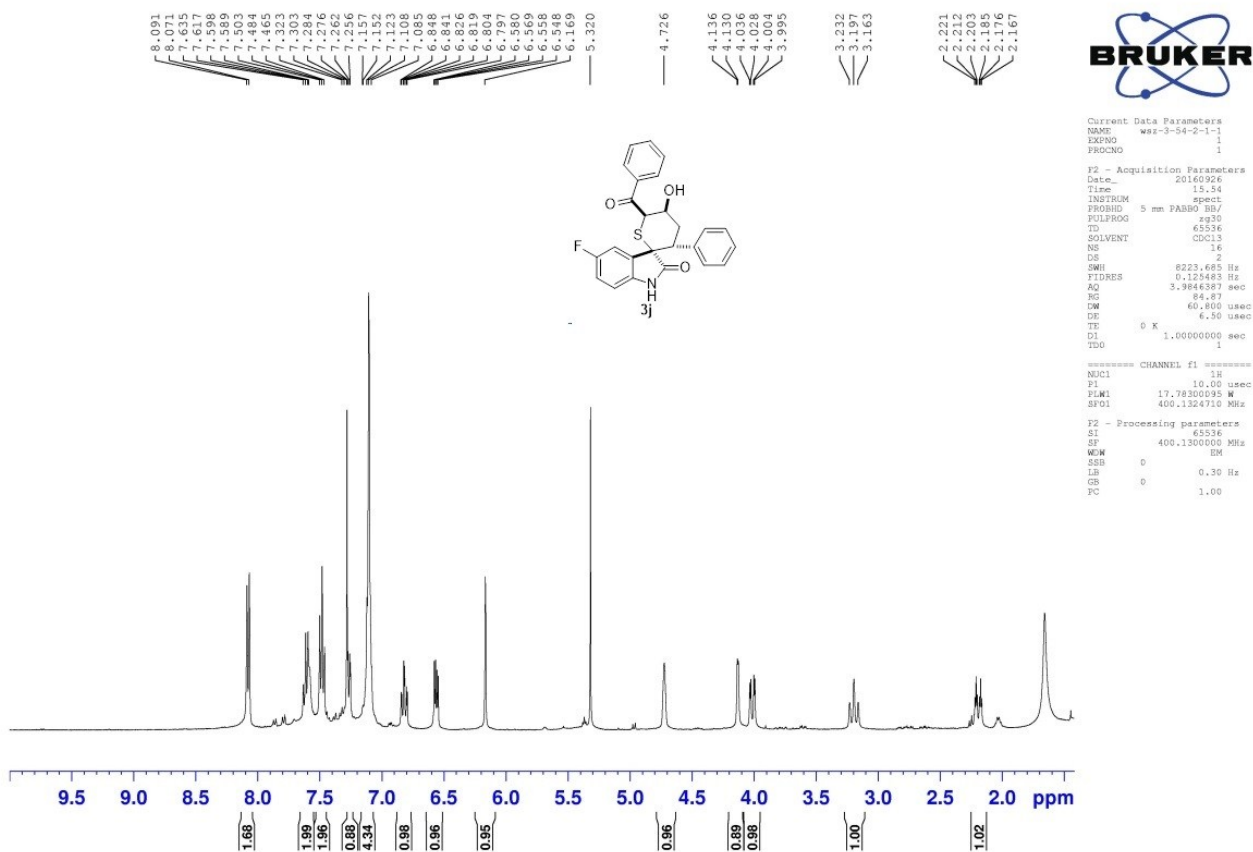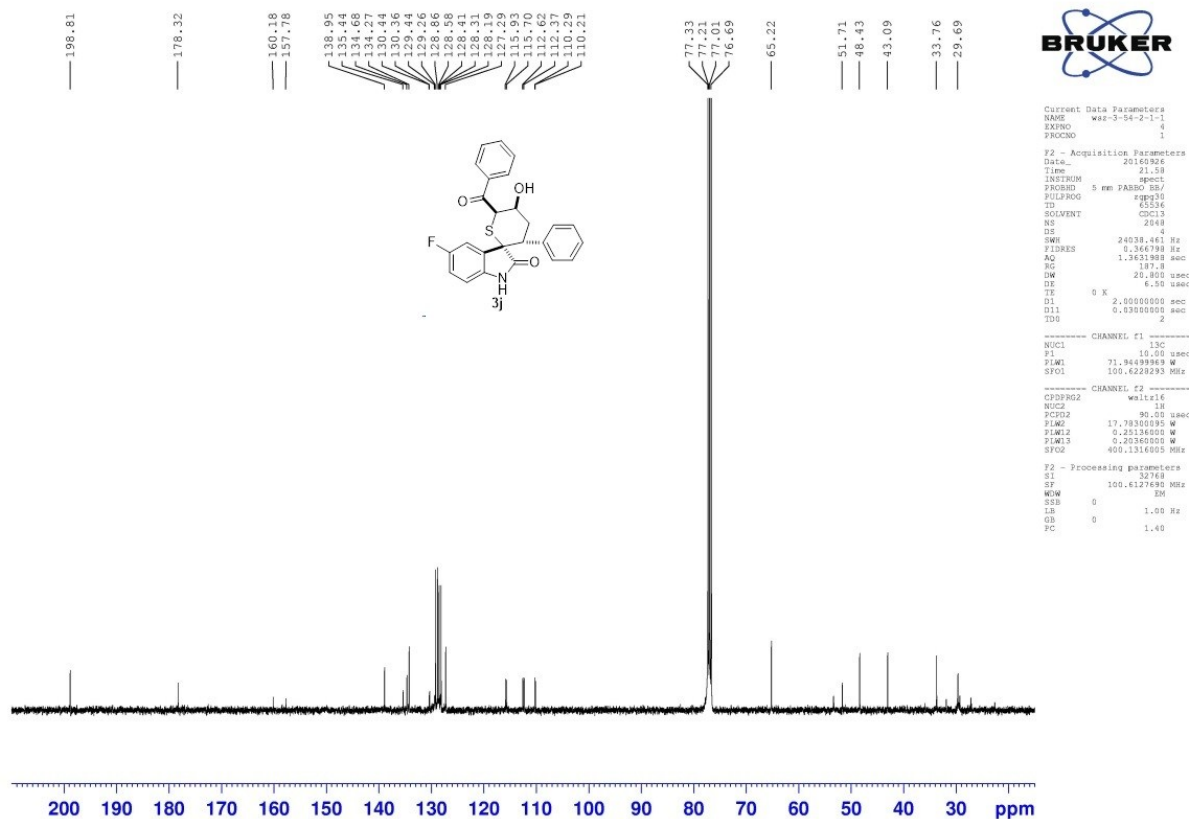

# Compound 3k

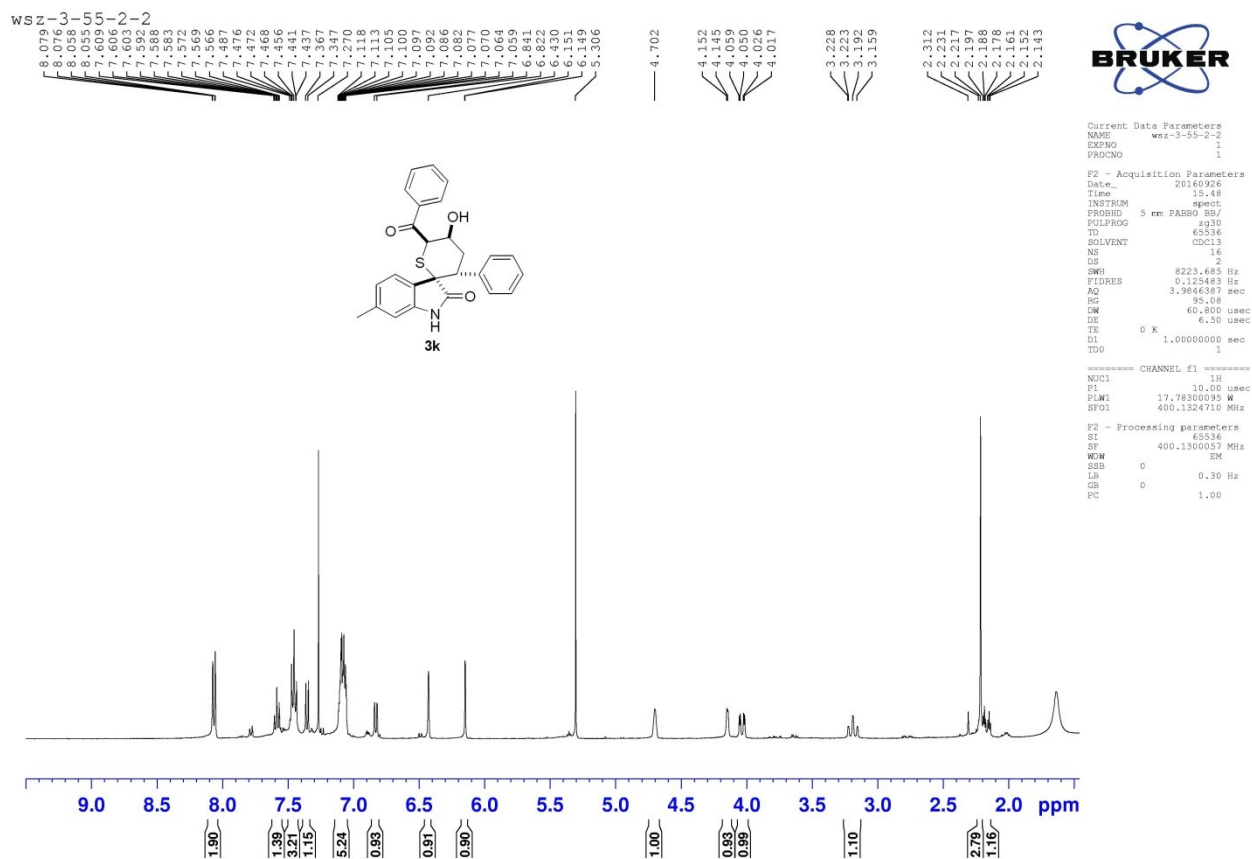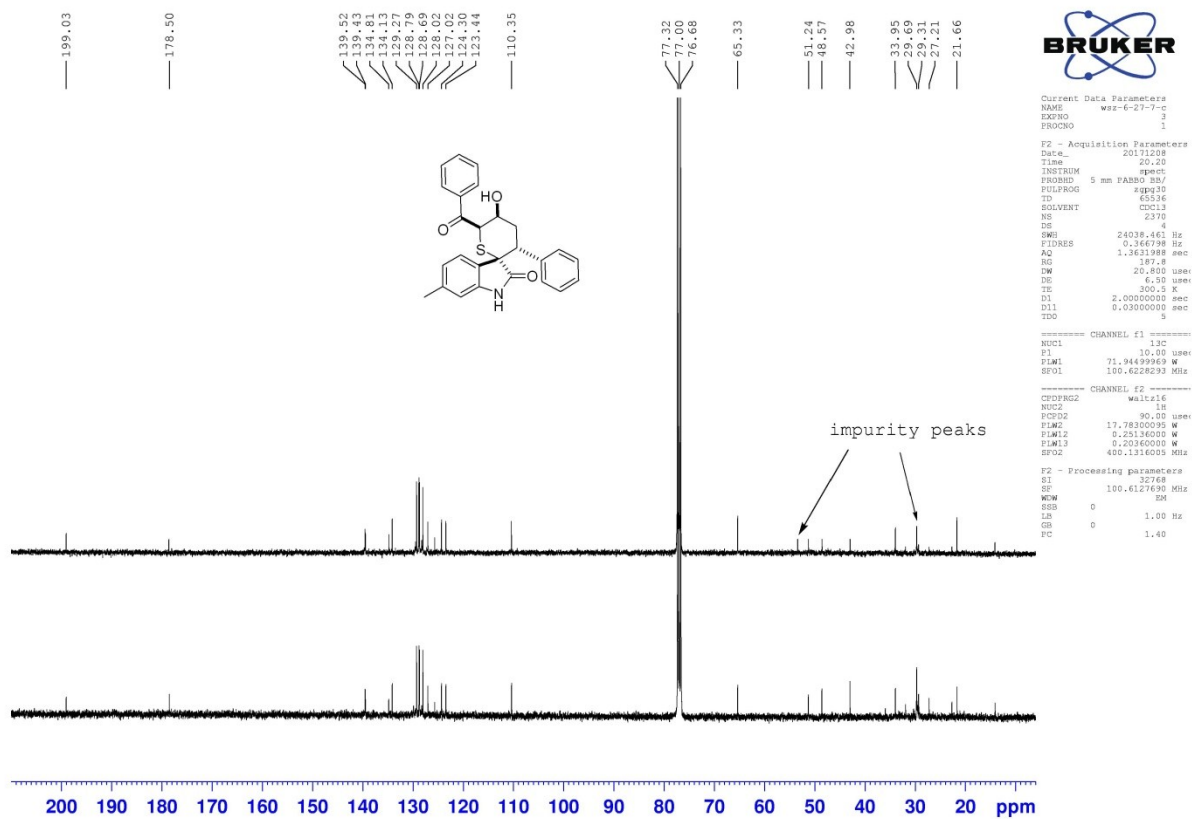



# Compound 3l

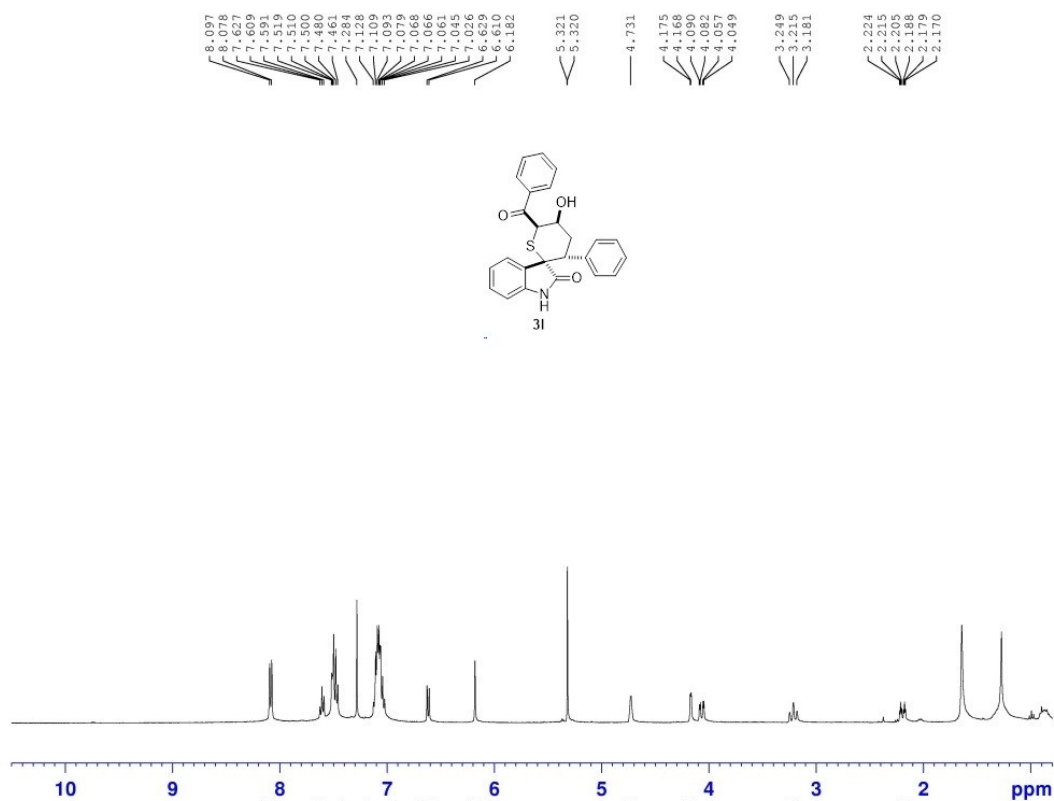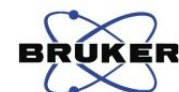

Current Data Parameters  
NAME wsr-3-55-6-1  
EXPNO 2  
PROCNO 1

F2 - Acquisition Parameters  
Date\_ 20161010  
Time 20.38  
INSTRUM spect  
PROBHD 5 mm PABBO BB/  
PULPROG zg30  
TD 65536  
SOLVENT CDCl3  
NS 16  
DS 2  
SWH 8223.685 Hz  
FIDRES 0.125483 Hz  
AQ 3.9846387 sec  
RG 35.08  
CW 60.800 usec  
DE 4.30 usec  
TE 0 K  
DT 1.00000000 sec  
TDO 1

===== CHANNEL f1 =====  
NUC1 1H  
P1 10.00 usec  
PLM1 17.78300095 W  
SFO1 400.1324710 MHz

F2 - Processing parameters  
SI 65536  
SF 400.1300000 MHz  
WEW EM  
SSB 0  
LB 0.30 Hz  
GB 0  
PC 1.00

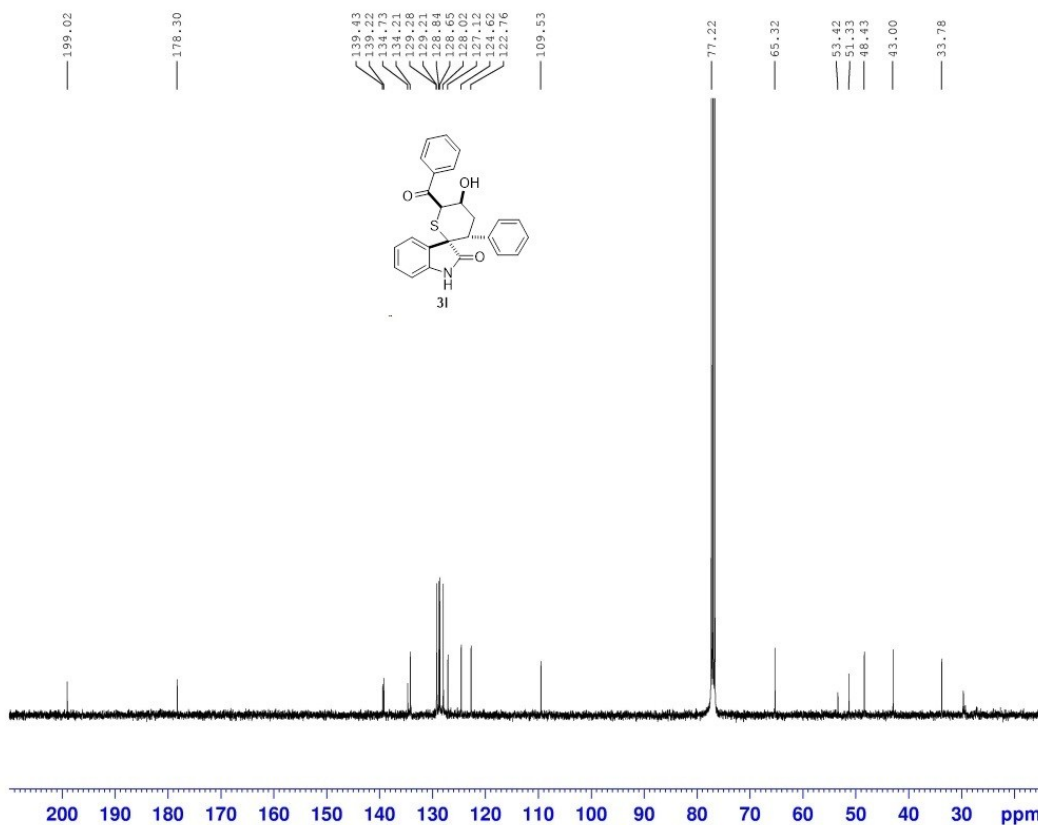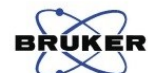

Current Data Parameters  
NAME wsr-3-55-6-1  
EXPNO 1  
PROCNO 1

F2 - Acquisition Parameters  
Date\_ 20161011  
Time 10.07  
INSTRUM spect  
PROBHD 5 mm PABBO BB/  
PULPROG zgpg30  
TD 65536  
SOLVENT CDCl3  
NS 2560  
DS 24038.461 Hz  
SWH 8.364798 Hz  
FIDRES 1.2631908 sec  
AQ 107.77  
RG 28.800 usec  
CW 6.50 usec  
TE 0 K  
DT 2.00000000 sec  
D11 0.03000000 sec  
TDO 0

===== CHANNEL f1 =====  
NUC1 13C  
P1 10.00 usec  
PLM1 71.94499969 W  
SFO1 100.6228293 MHz

===== CHANNEL f2 =====  
CPDPRG2 waltz16  
NUC2 1H  
PCPD2 90.00 usec  
PLM2 17.78300095 W  
PLM3 0.20360000 W  
SFO2 400.1316005 MHz

F2 - Processing parameters  
SI 32768  
SF 100.6127690 MHz  
WEW EM  
SSB 0  
LB 1.00 Hz  
GB 0  
PC 1.40

# Compound 3m

wsz-27-6-1

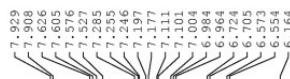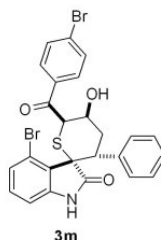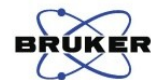

Current Data Parameters  
NAME wsz-27-6-1  
EXPNO 1  
PROCNO 1

F2 - Acquisition Parameters  
Date\_ 20171120  
Time 17.29  
INSTRUM spect  
PROBHD 5 mm PABBO BB/  
PULPROG zg30  
TD 65536  
SOLVENT CDCl3  
NS 16  
DS 2  
SWH 8223.685 Hz  
FIDRES 0.125483 Hz  
AQ 3.9646387 sec  
RG 95.08  
DM 60.800 usec  
DE 6.50 usec  
TE 292.4 K  
D1 1.00000000 sec  
TD0 1

===== CHANNEL f1 =====  
NUC1 1H  
P1 10.00 usec  
PLW1 17.78300095 W  
SFO1 400.1324710 MHz

F2 - Processing parameters  
SI 65536  
SF 400.1300000 MHz  
WDM 0  
SSB 0  
LB 0.30 Hz  
GB 0  
PC 1.00

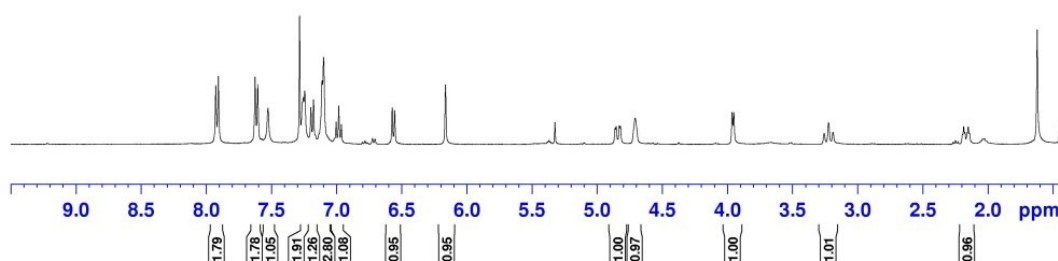

197.479

177.323

141.520  
139.288  
138.284  
132.191  
130.720  
130.638  
129.439  
128.179  
127.759  
127.408  
126.370  
120.163  
108.702

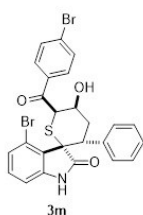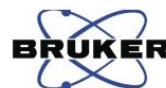

Current Data Parameters  
NAME wsz-10-3m  
EXPNO 3  
PROCNO 1

F2 - Acquisition Parameters  
Date\_ 20170311  
Time 12.23  
INSTRUM spect  
PROBHD 5 mm PABBO BB/  
PULPROG zgpg30  
TD 65536  
SOLVENT CDCl3  
NS 1024  
DS 4  
SWH 24038.461 Hz  
FIDRES 0.366798 Hz  
AQ 1.3631988 sec  
RG 107.77  
DM 29.800 usec  
DE 6.50 usec  
TE 294.9 K  
D1 2.00000000 sec  
D11 0.03000000 sec  
TD0 1

===== CHANNEL f1 =====  
NUC1 13C  
P1 10.00 usec  
PLW1 71.34499969 W  
SFO1 100.6288293 MHz

===== CHANNEL f2 =====  
CPDPRG2 waltz16  
NUC2 1H  
PCPD2 90.00 usec  
PLW2 17.78300095 W  
PLW12 0.25136000 W  
PLW13 0.20360000 W  
SFO2 400.1316005 MHz

F2 - Processing parameters  
SI 32768  
SF 100.6127690 MHz  
WDM 0  
SSB 0  
LB 1.00 Hz  
GB 0  
PC 1.40

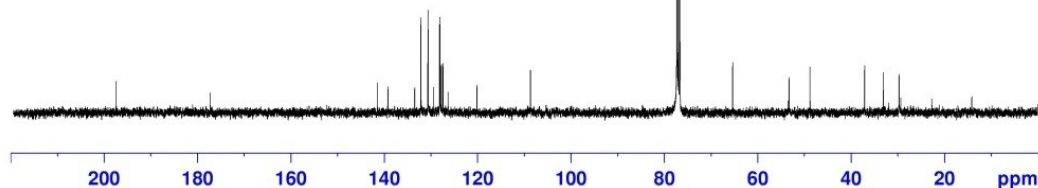



# Compound 3n

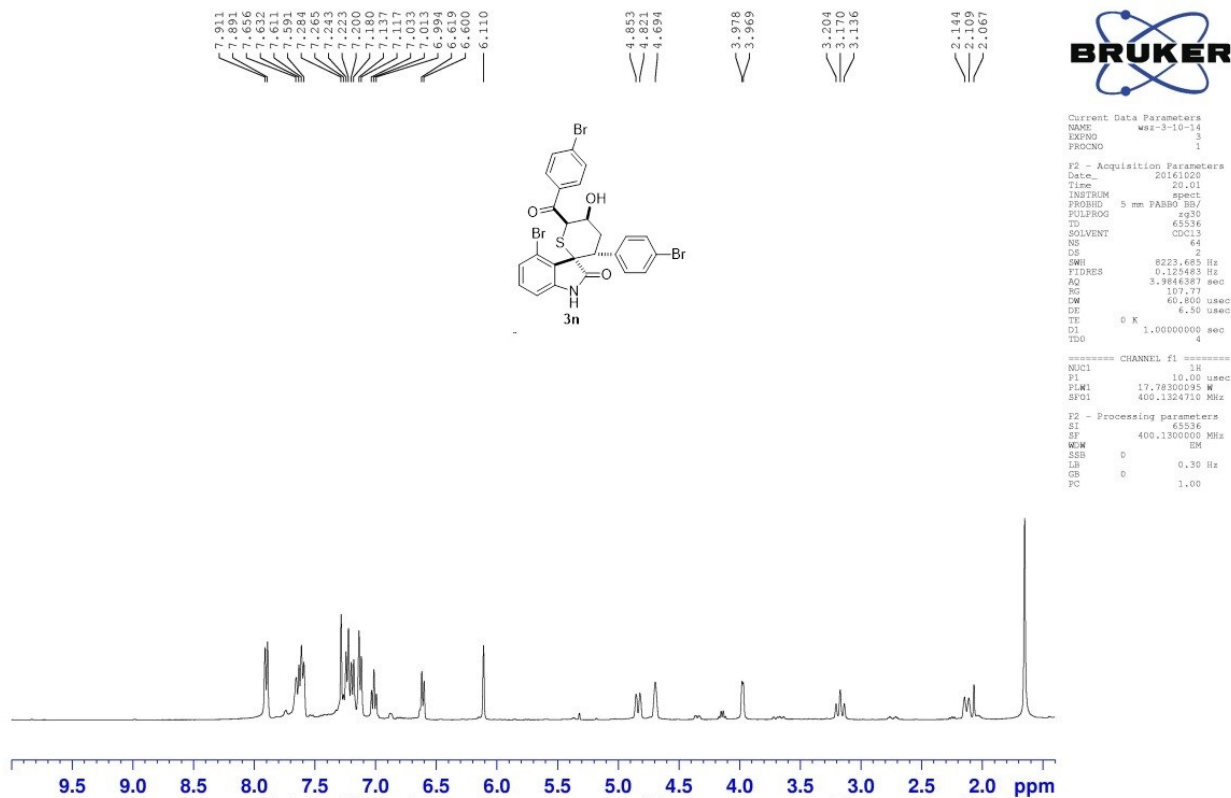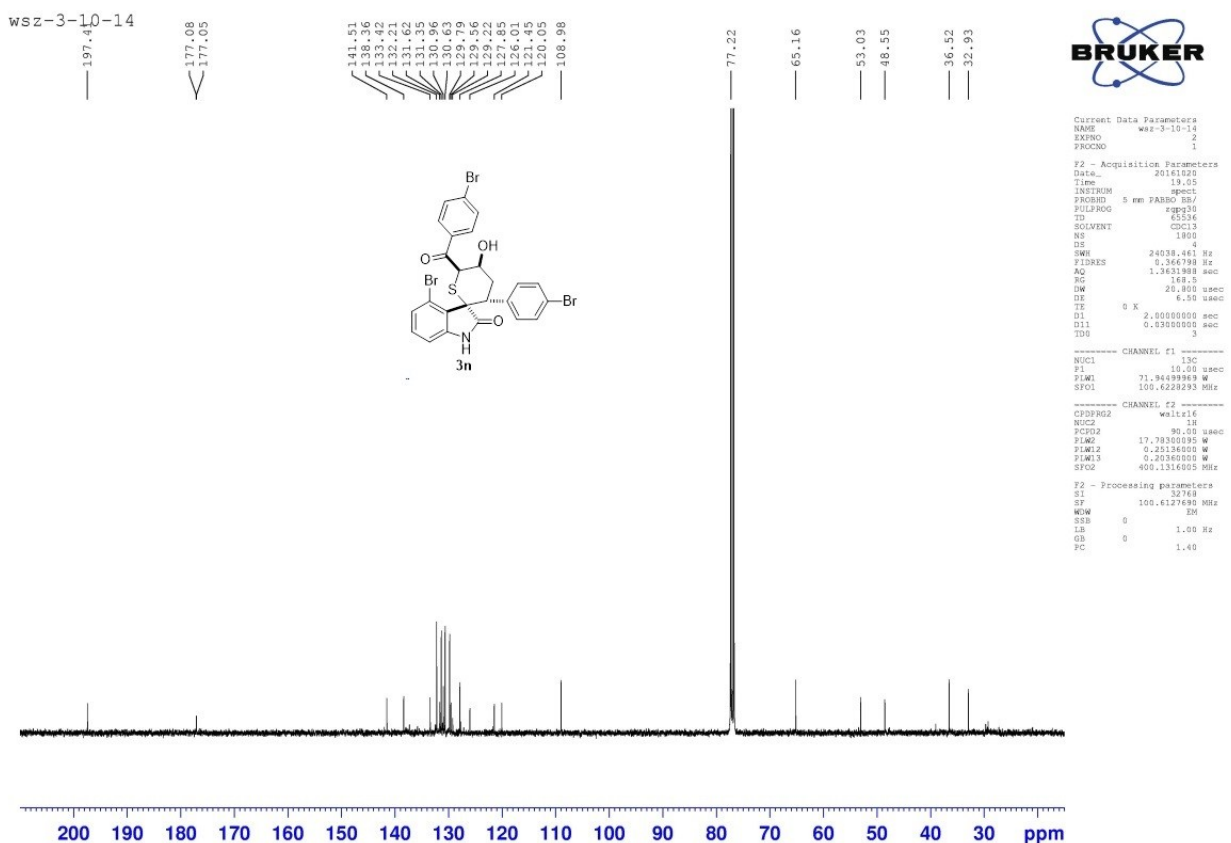

# Compound 3o

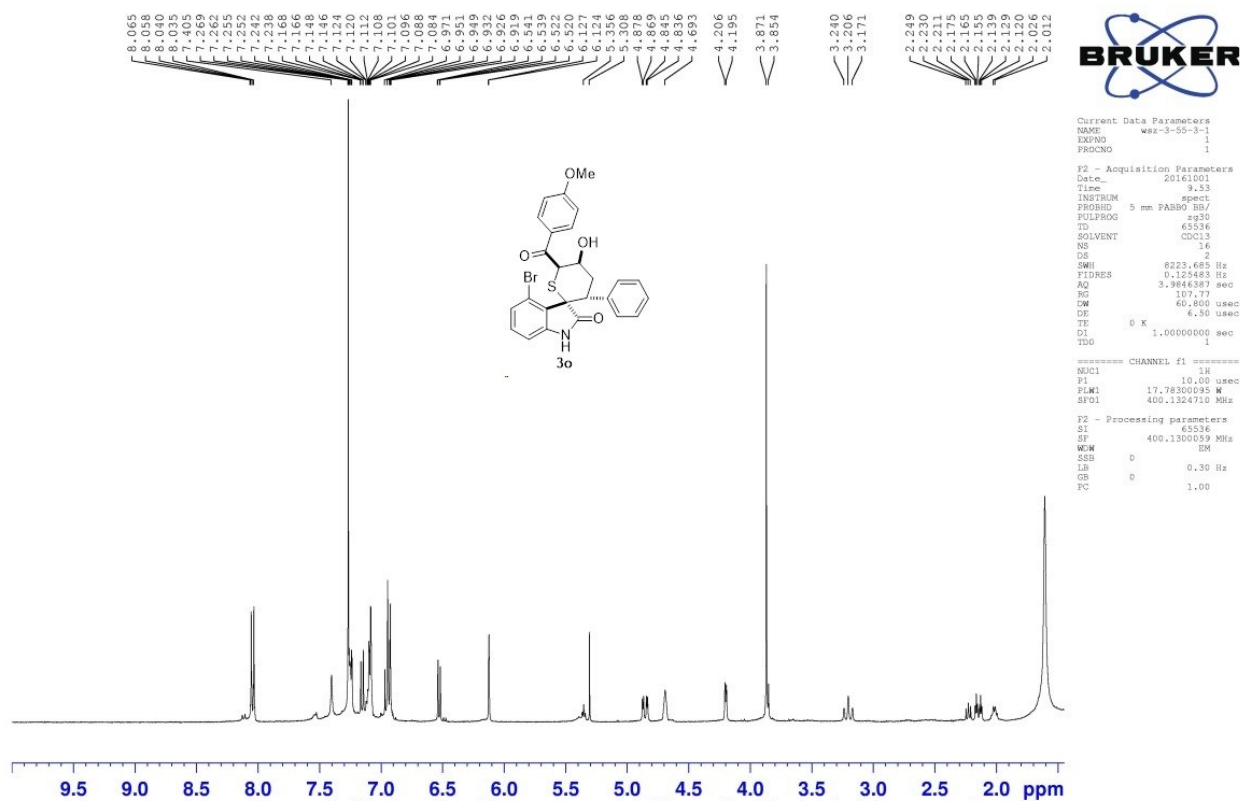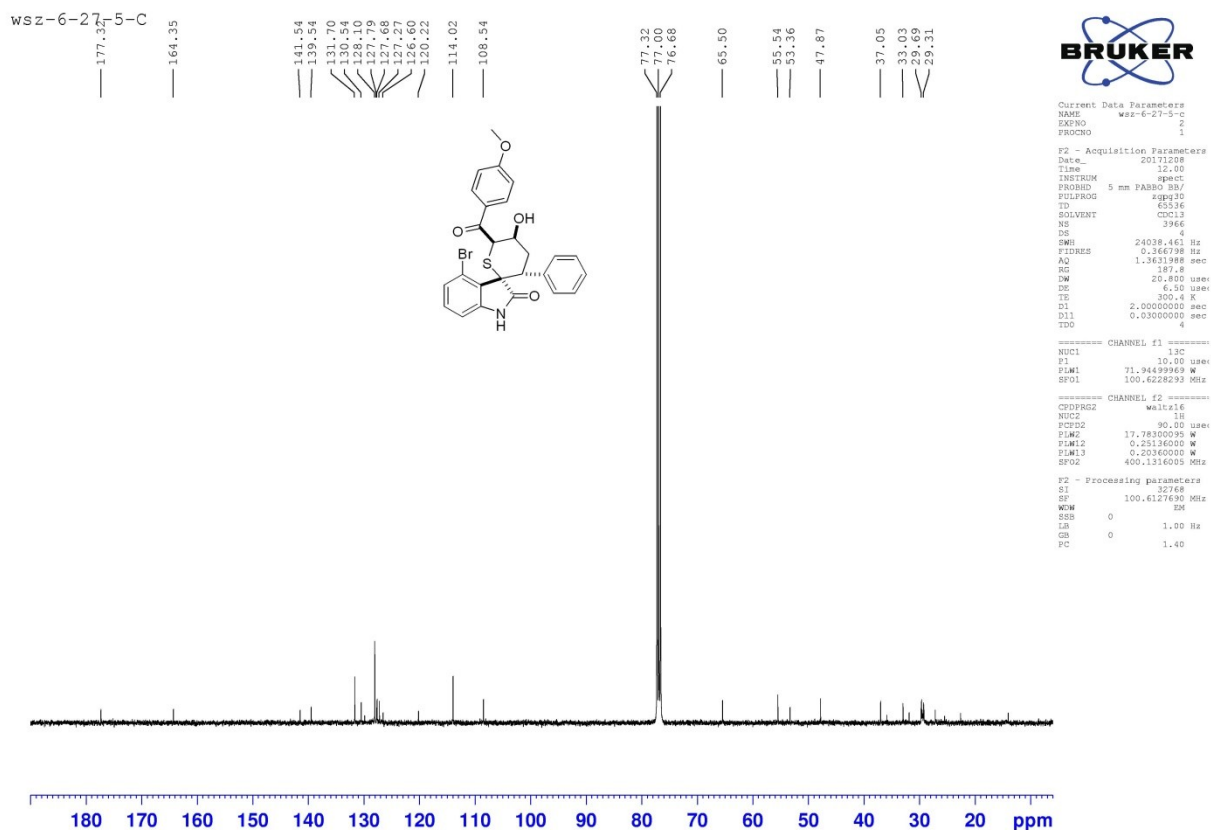

# Compound 3p

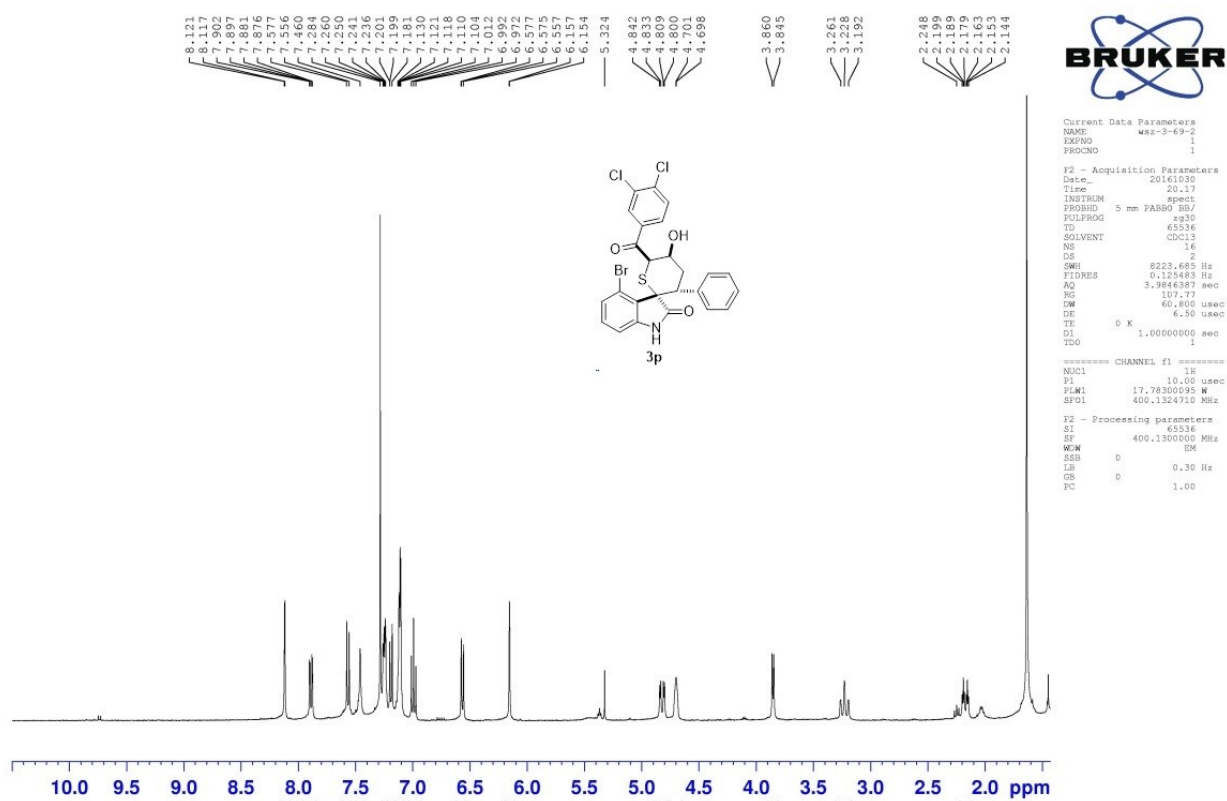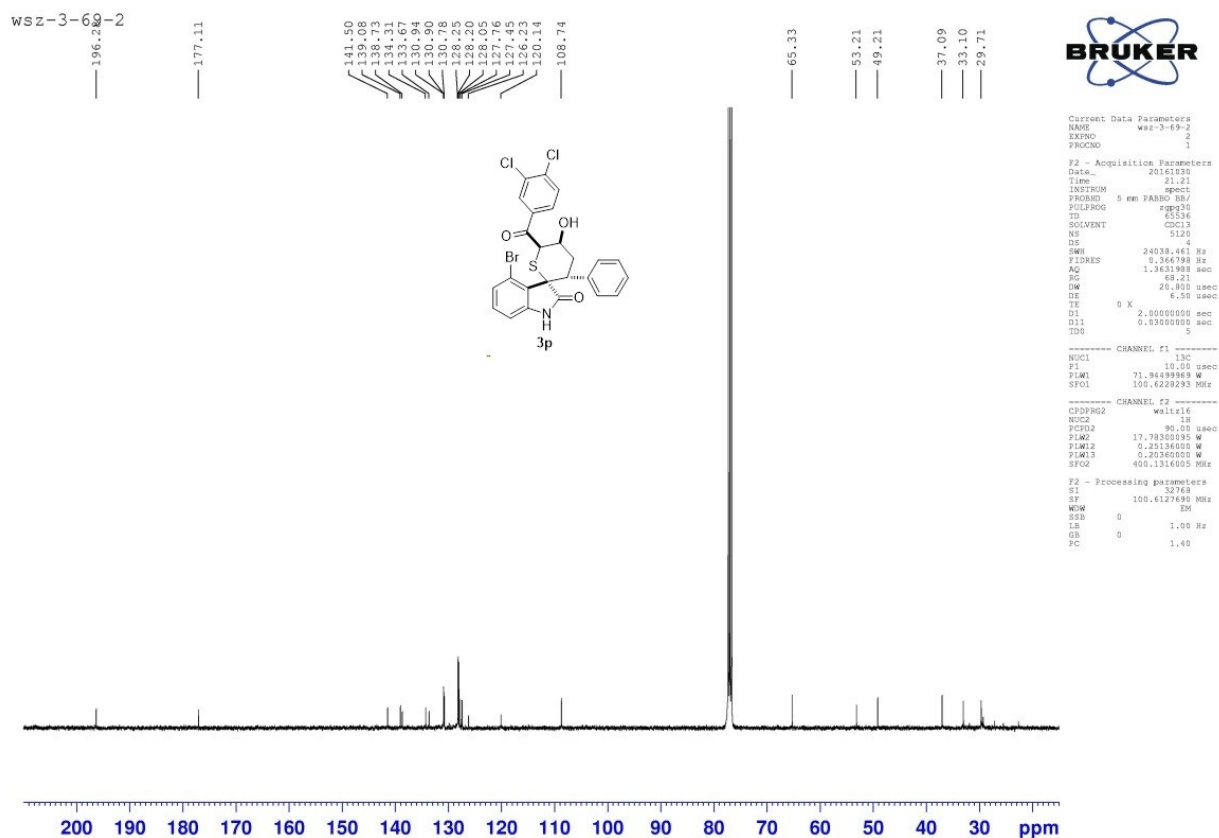

# Compound 3q

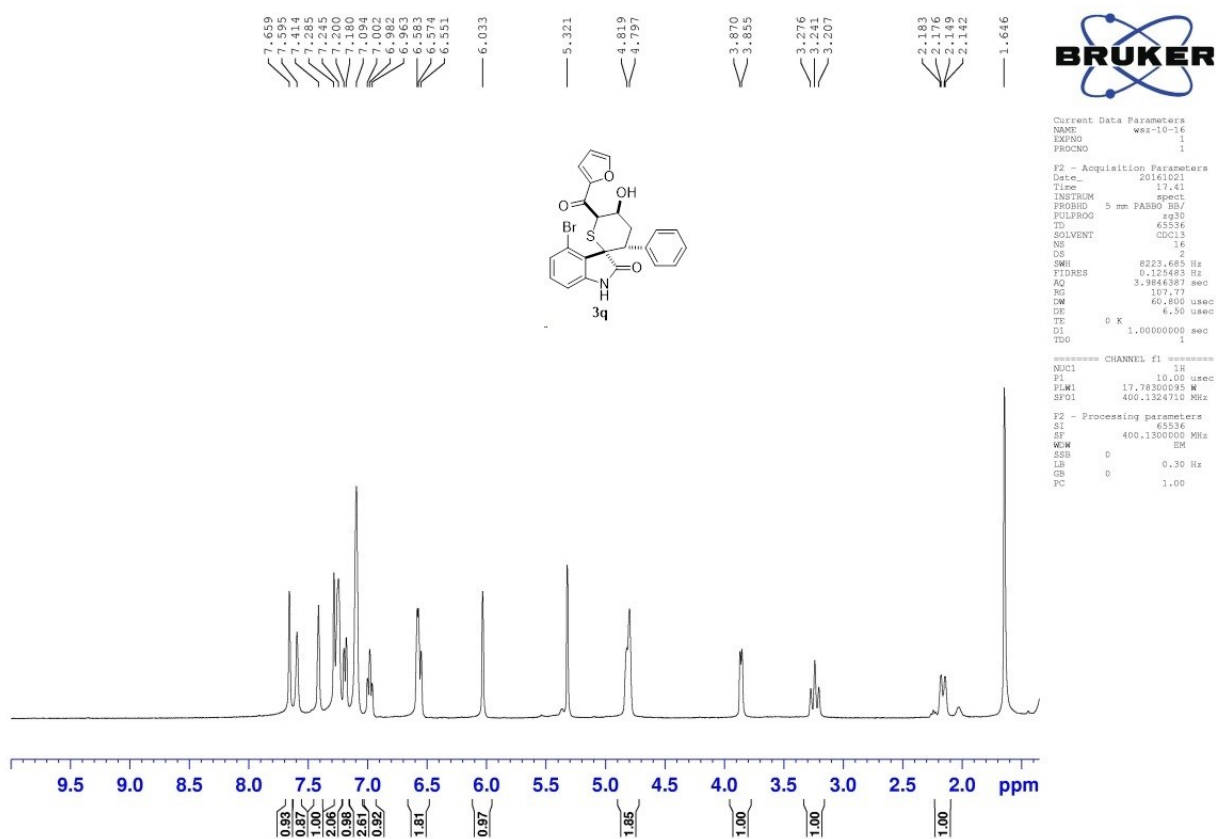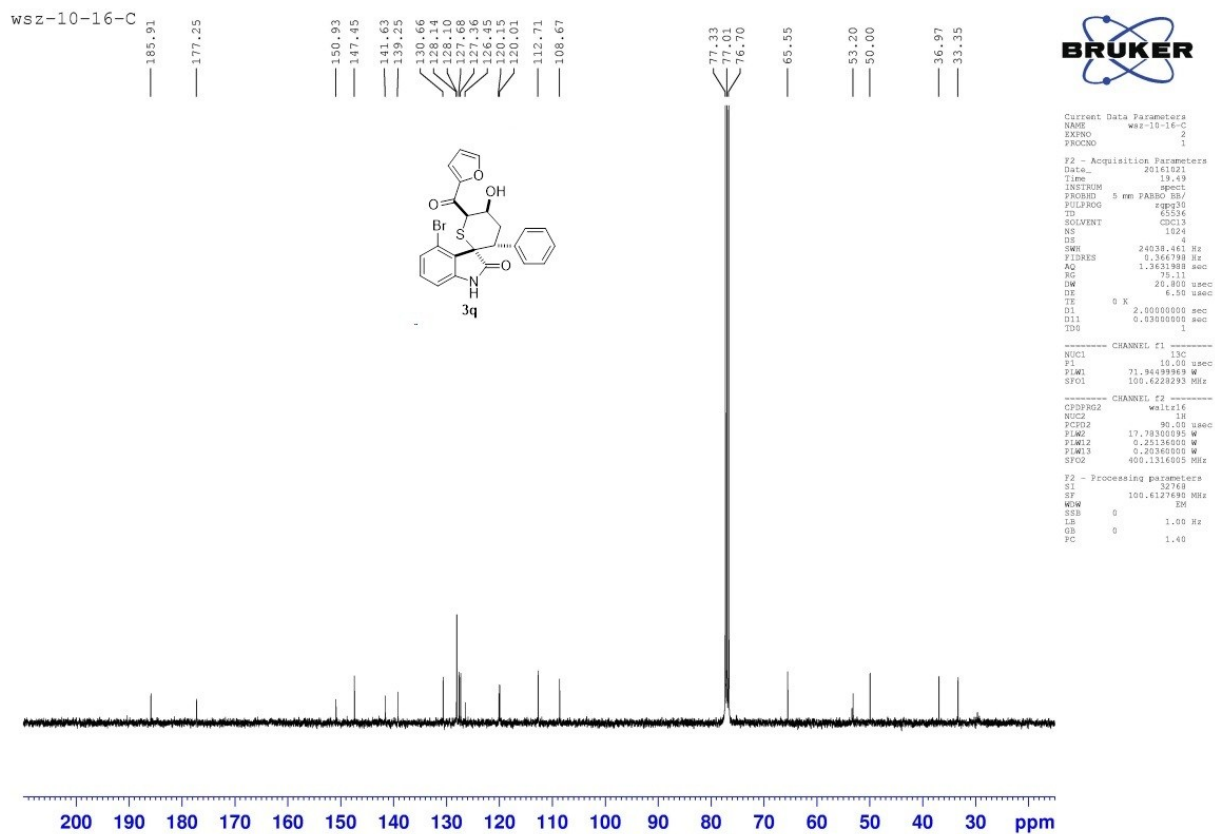

# Compound 3r

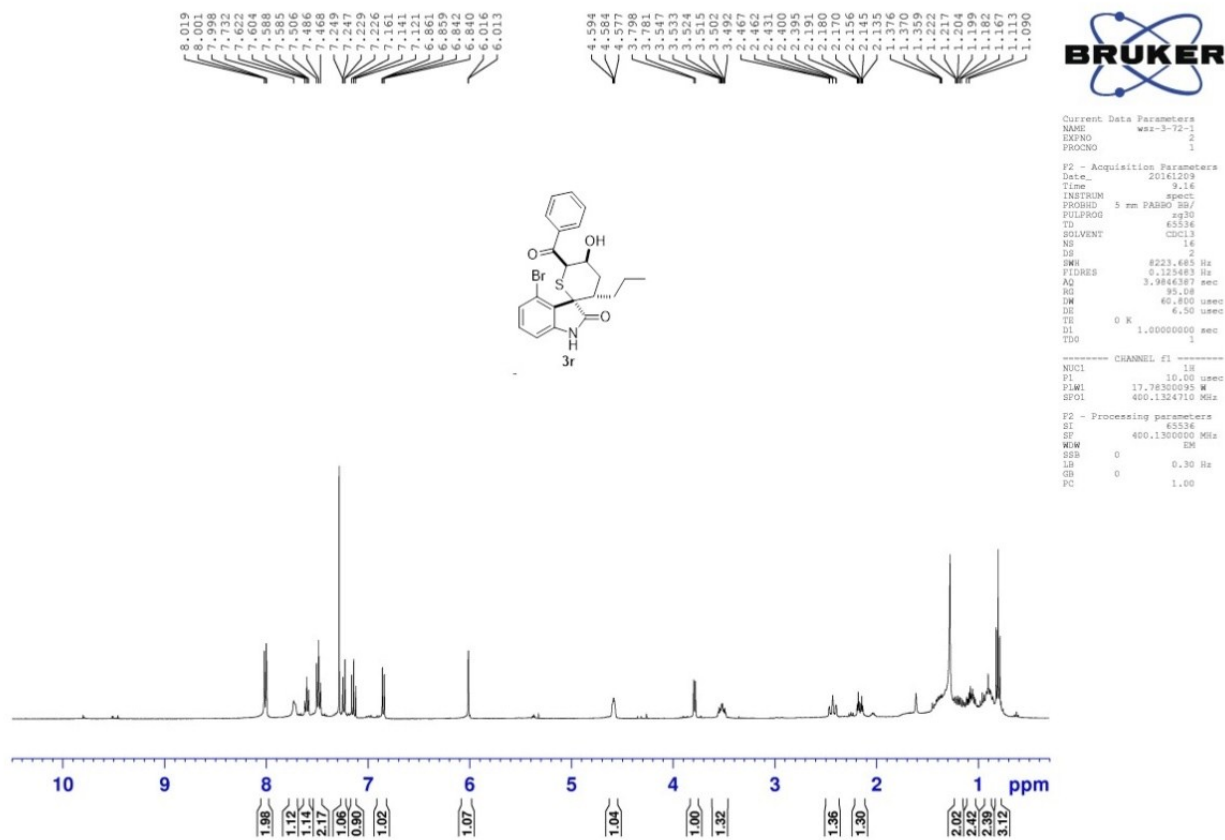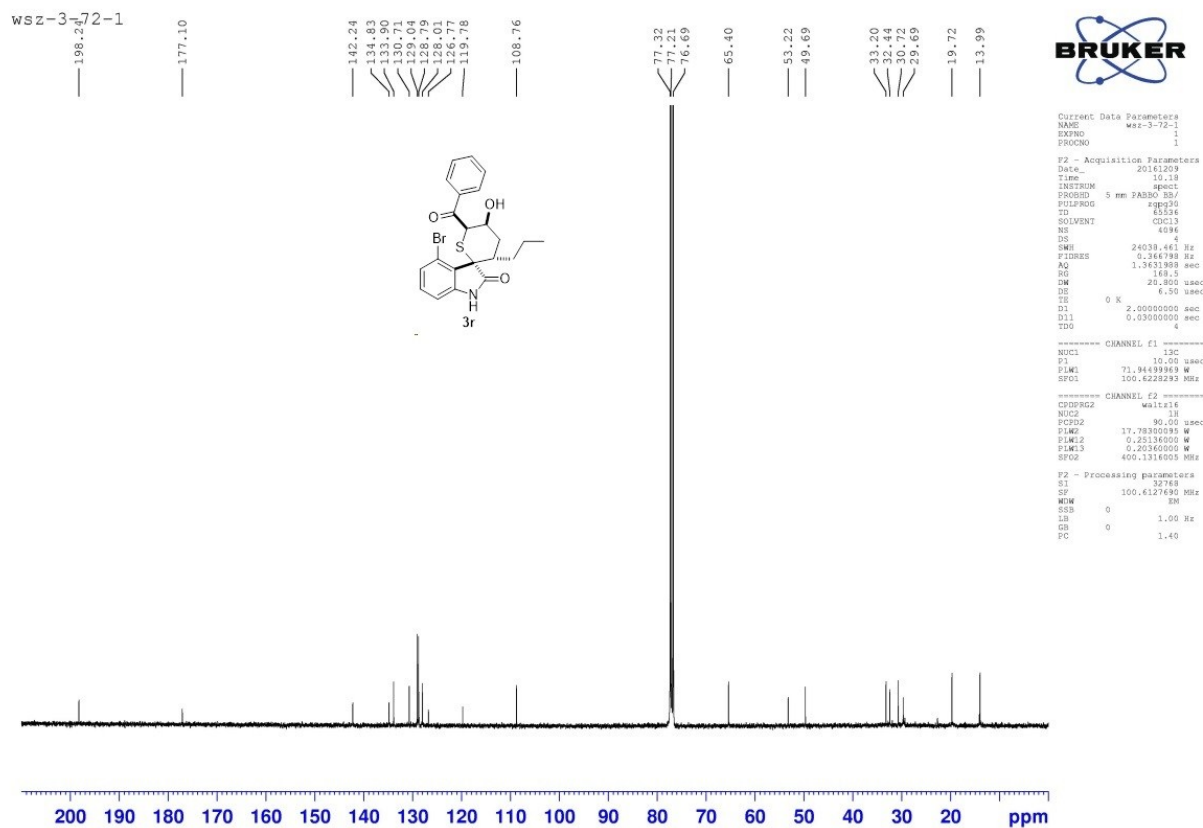

# Compound 3s

wsz-6-13-2-c-1

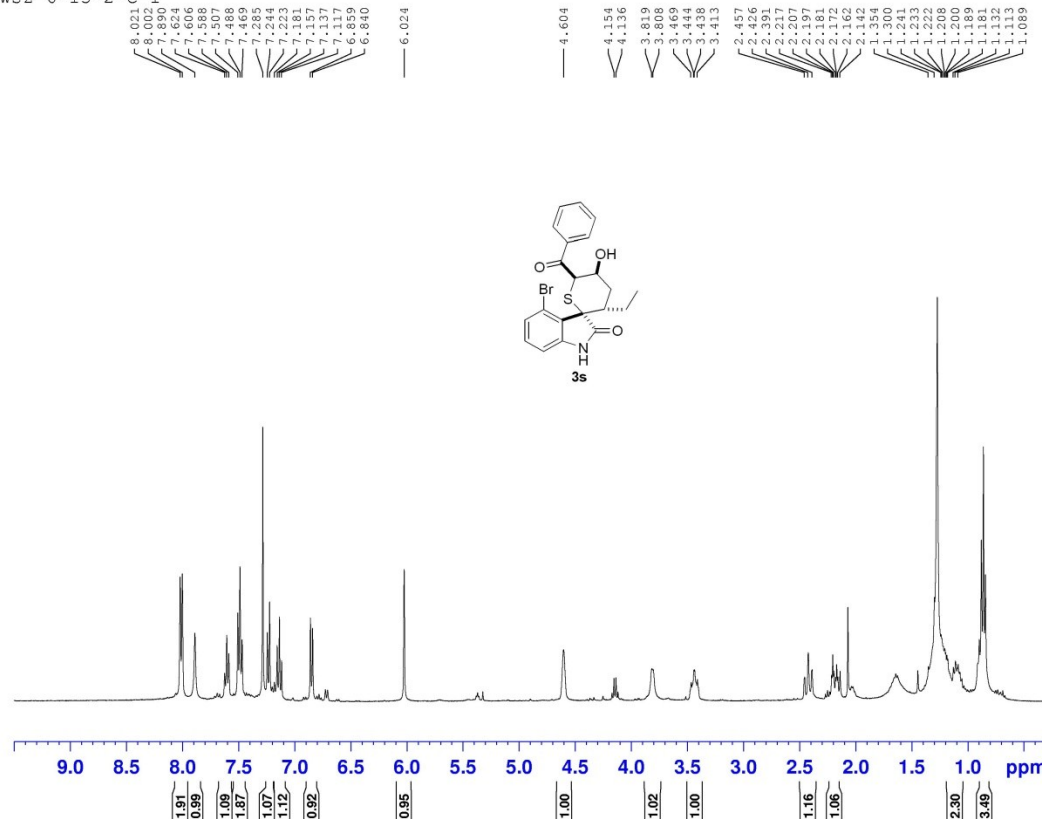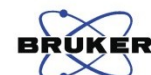

Current Data Parameters  
NAME: wsz-6-13-2-c-1  
EXNO: 1  
PROCNO: 1

F2 - Acquisition Parameters  
Date\_: 20171204  
Time: 20.23  
INSTRUM: spect  
PROBHD: 5 mm PABBO BB/  
PULPROG: zg30  
TD: 65536  
SOLVENT: CDCl3  
NS: 16  
DS: 2  
SWH: 8223.685 Hz  
FIDRES: 0.125483 Hz  
AQ: 3.9846387 sec  
RG: 95.08  
DM: 60.800 usec  
DE: 6.30 usec  
TE: 293.3 K  
D1: 1.0000000 sec  
TD0: 1

===== CHANNEL f1 =====  
NUC1: 1H  
P1: 10.00 usec  
PLM1: 17.78300095 W  
SF01: 400.1304710 MHz

F2 - Processing parameters  
SI: 65536  
SF: 400.1300000 MHz  
WDW: EM  
SSB: 0  
LB: 0.30 Hz  
GB: 0  
PC: 1.00

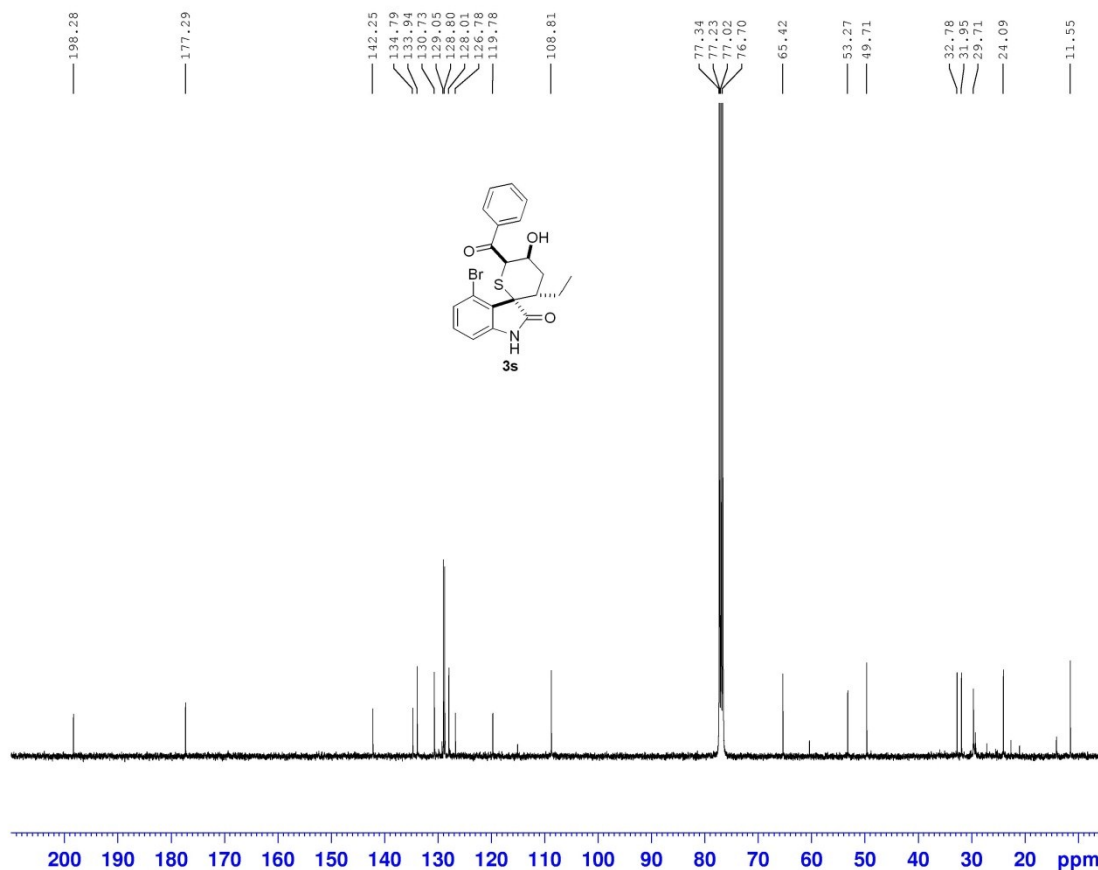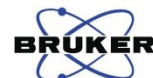

Current Data Parameters  
NAME: wsz-6-13-2-c-1  
EXNO: 2  
PROCNO: 1

F2 - Acquisition Parameters  
Date\_: 20171204  
Time: 23.46  
INSTRUM: spect  
PROBHD: 5 mm PABBO BB/  
PULPROG: zgpg30  
TD: 65536  
SOLVENT: CDCl3  
NS: 8192  
DS: 4  
SWH: 24038.461 Hz  
FIDRES: 0.366798 Hz  
AQ: 1.263398 sec  
RG: 151.48  
DM: 20.800 usec  
DE: 6.50 usec  
TE: 303.7 K  
D1: 2.0000000 sec  
D11: 0.0300000 sec  
TD0: 8

===== CHANNEL f1 =====  
NUC1: 13C  
P1: 10.00 usec  
PLM1: 71.9449999 W  
SF01: 100.6228293 MHz

===== CHANNEL f2 =====  
CPDPRG2: waltz16  
NUC2: 1H  
PCPD2: 90.00 usec  
PLM2: 17.78300095 W  
PLM12: 0.25136000 W  
PLM13: 0.20360000 W  
SF02: 400.1316005 MHz

F2 - Processing parameters  
SI: 32768  
SF: 100.6127690 MHz  
WDW: EM  
SSB: 0  
LB: 1.00 Hz  
GB: 0  
PC: 1.40



# Compound 4a

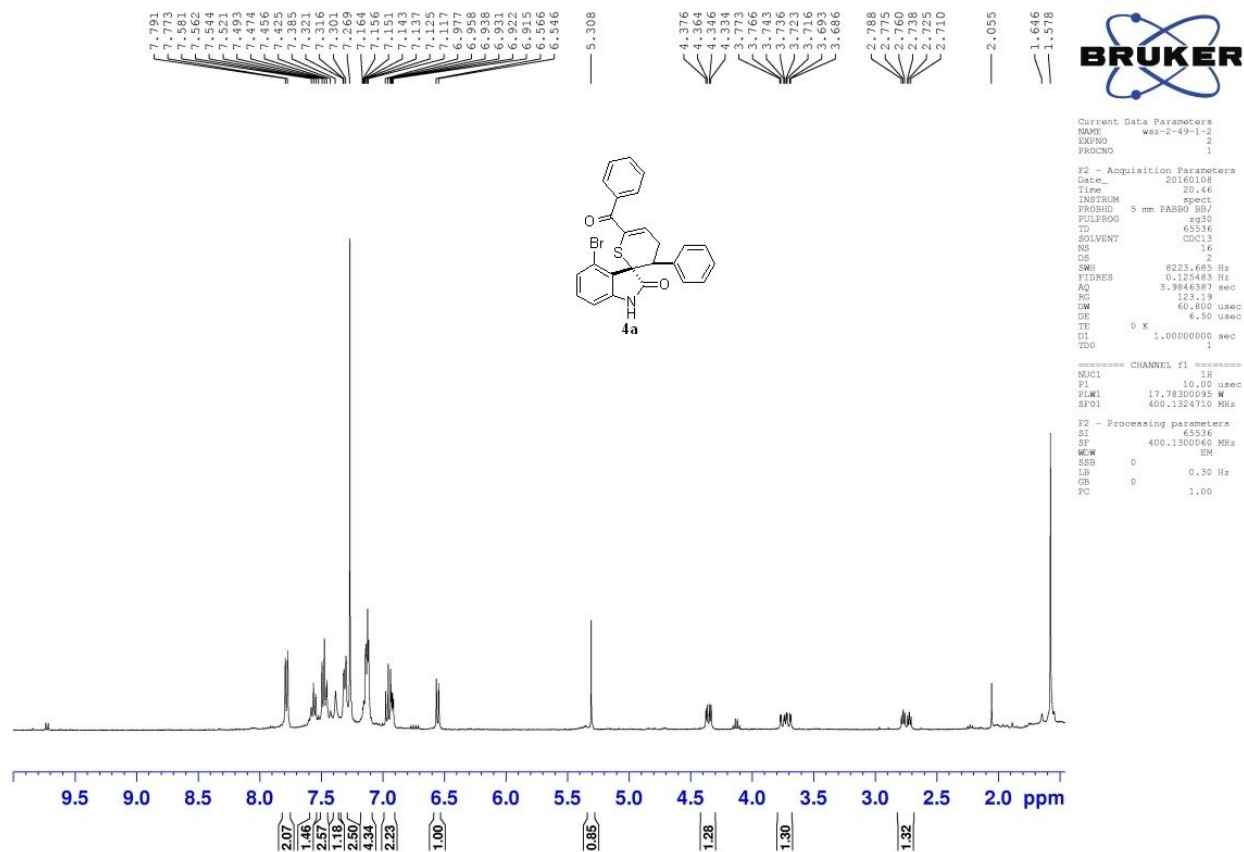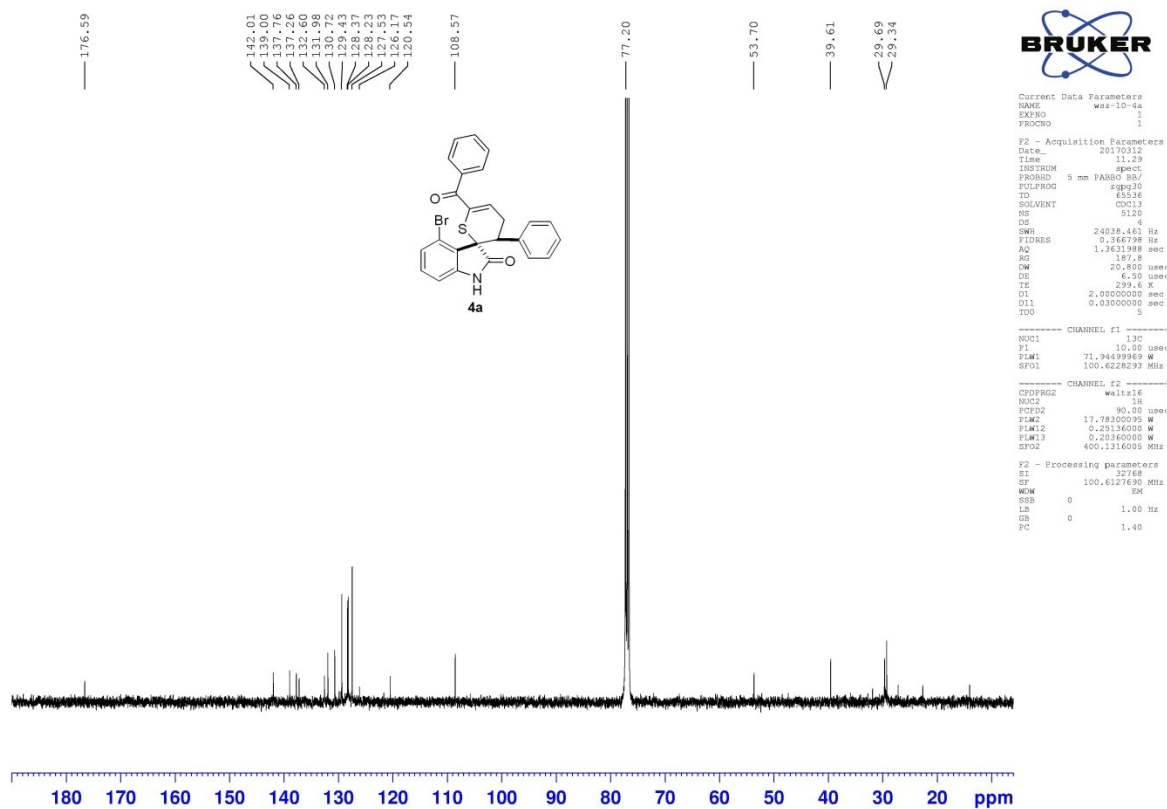

# Compound 3aa

wsz-4-7

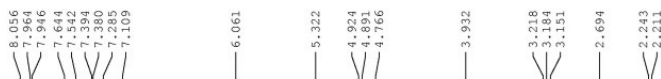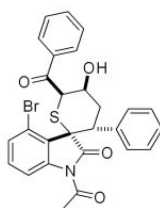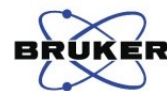

Current Data Parameters  
NAME wsz-4-7  
EXPNO 1  
PROCNO 1

F2 - Acquisition Parameters  
Date\_ 20170505  
Time 16.45  
INSTRUM spect  
PROBHD 5 mm PABBO BB/  
PULPROG zgpg30  
TD 65536  
SOLVENT CDCl3  
NS 16  
DS 2  
SWH 8223.685 Hz  
FIDRES 0.125483 Hz  
AQ 3.9846387 s  
RG 95.08  
DW 60.800 u  
DE 6.50 u  
TE 291.8 K  
D1 1.00000000 s  
TD0 1

CHANNEL f1  
NUC1 1H  
P1 10.00 u  
PLW1 17.78300095 W  
SFO1 400.1324710 MHz

F2 - Processing parameters  
SI 65536  
SF 400.1300000 MHz  
WDW EM  
SSB 0  
LB 0.30 Hz  
GB 0  
PC 1.00

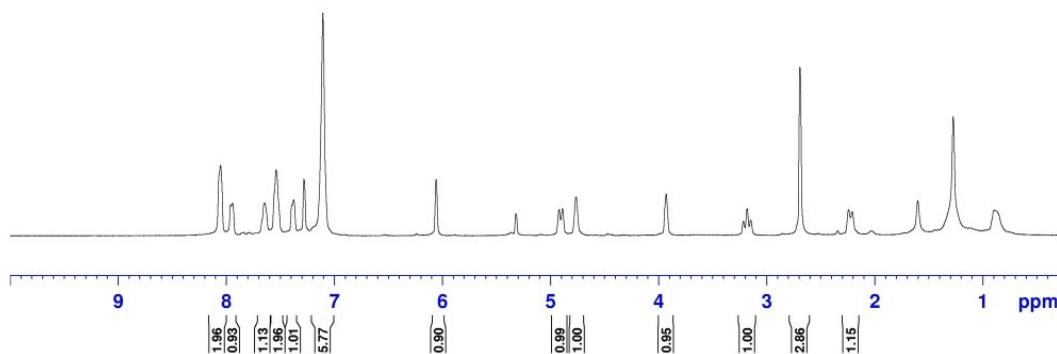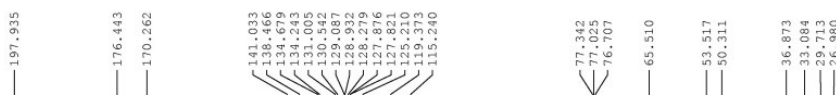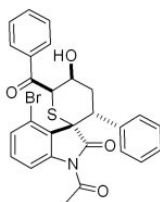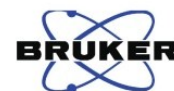

Current Data Parameters  
NAME wsz-4-7-C  
EXPNO 1  
PROCNO 1

F2 - Acquisition Parameters  
Date\_ 20170507  
Time 20.15  
INSTRUM spect  
PROBHD 5 mm PABBO BB/  
PULPROG zgpg30  
TD 65536  
SOLVENT CDCl3  
NS 2048  
DS 4  
SWH 24038.461 Hz  
FIDRES 0.366798 Hz  
AQ 1.3631988 sec  
RG 168.5  
DW 20.800 usec  
DE 6.50 usec  
TE 292.7 K  
D1 2.00000000 sec  
D11 0.03000000 sec  
TD0 2

CHANNEL f1  
NUC1 13C  
P1 10.00 usec  
PLW1 71.94499969 W  
SFO1 100.6228293 MHz

CHANNEL f2  
CPDPRG2 waltz16  
NUC2 1H  
PCPD2 90.00 usec  
PLW2 17.78300095 W  
PLW12 0.25136000 W  
PLW13 0.20360000 W  
SFO2 400.1316005 MHz

F2 - Processing parameters  
SI 32768  
SF 100.6127690 MHz  
WDW EM  
SSB 0  
LB 1.00 Hz  
GB 0  
PC 1.40

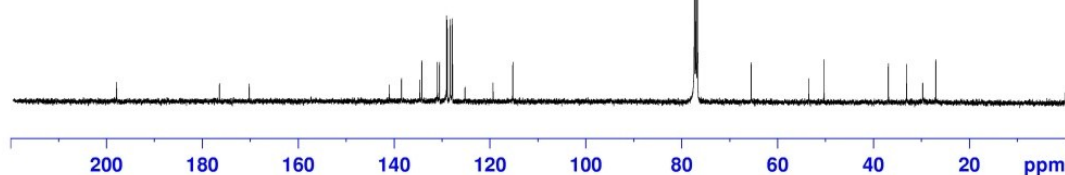



# Compound 3ab

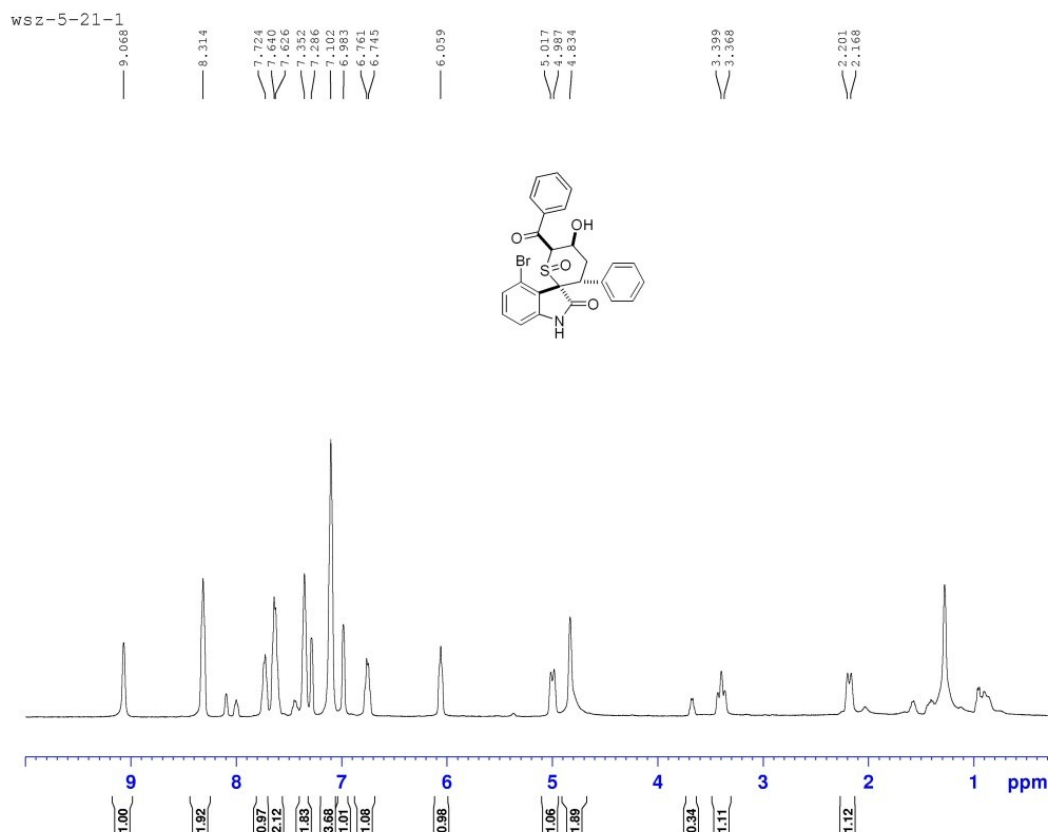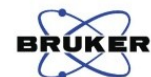

Current Data Parameters  
NAME wsz-5-21-1  
EXPNO 1  
PROCNO 1

F2 - Acquisition Parameters  
Date\_ 20170619  
Time 9.10  
INSTRUM spect  
PROBHD 5 mm FARGO BB/  
PULPROG zg30  
TD 65536  
SOLVENT CDCl3  
NS 16  
DS 2  
SWH 8223.685 Hz  
FIDRES 0.125483 Hz  
AQ 3.9846387 sec  
RG 107.77  
DM 60.800 usec  
DE 6.50 usec  
TE 299.6 K  
D1 1.00000000 sec  
TDO 1

===== CHANNEL f1 =====  
NUC1 1H  
P1 10.00 usec  
PLW1 17.78300095 M  
SFO1 400.1324710 MHz

F2 - Processing parameters  
SI 65536  
SF 400.1300000 MHz  
WDW EM  
SSB 0  
LB 0.30 Hz  
GB 0  
PC 1.00

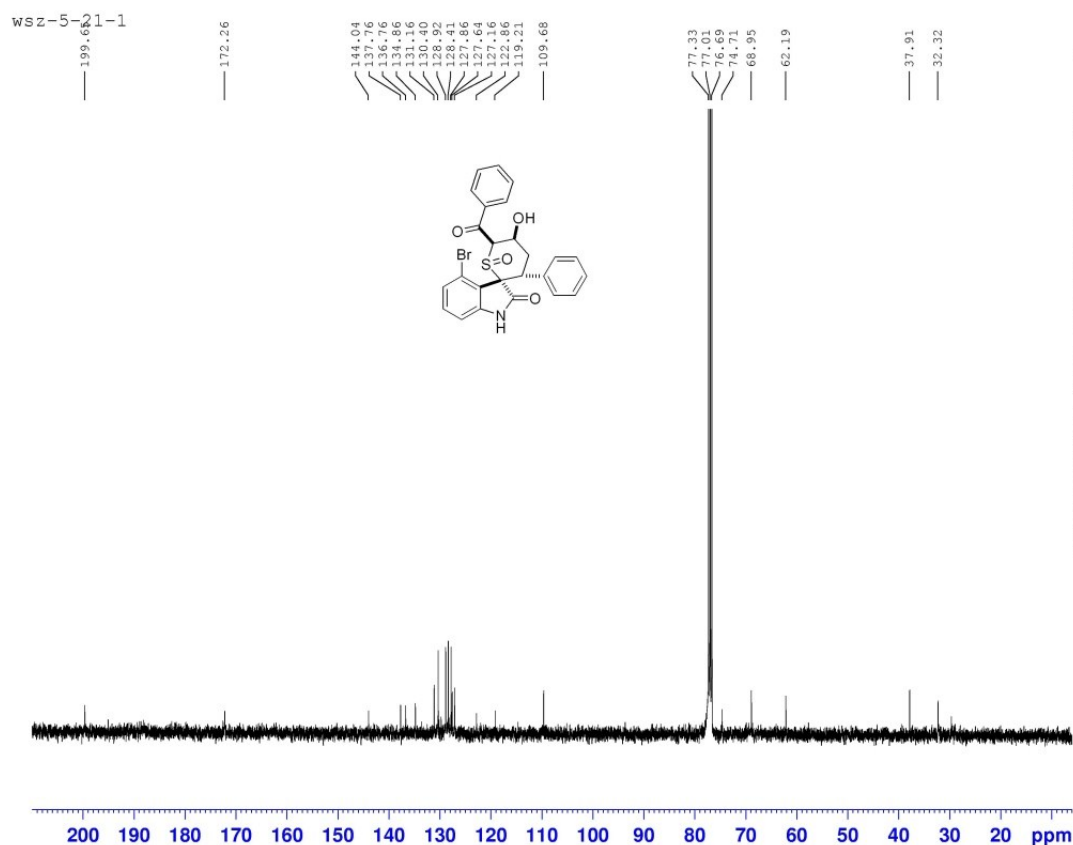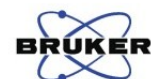

Current Data Parameters  
NAME wsz-5-21-1  
EXPNO 3  
PROCNO 1

F2 - Acquisition Parameters  
Date\_ 20170620  
Time 12.02  
INSTRUM spect  
PROBHD 5 mm FARGO BB/  
PULPROG zgpg30  
TD 65536  
SOLVENT CDCl3  
NS 502  
DS 4  
SWH 24038.46 Hz  
FIDRES 0.366798 Hz  
AQ 1.361988 sec  
RG 187.8  
DM 20.800 usec  
DE 6.50 usec  
TE 297.6 K  
D1 2.00000000 sec  
D11 0.03000000 sec  
TDO 3

===== CHANNEL f1 =====  
NUC1 13C  
P1 10.00 usec  
PLW1 17.78300095 M  
SFO1 100.6228293 MHz

===== CHANNEL f2 =====  
CPDPRG2 waltz16  
NUC2 1H  
PCPD2 90.00 usec  
PLW2 17.78300095 M  
PLW12 0.23136000 M  
PLW13 0.20360000 M  
SFO2 400.1316003 MHz

F2 - Processing parameters  
SI 32768  
SF 100.6127690 MHz  
WDW EM  
SSB 0  
LB 1.00 Hz  
GB 0  
PC 1.40

# Compound 3ac

wsz-so2-2

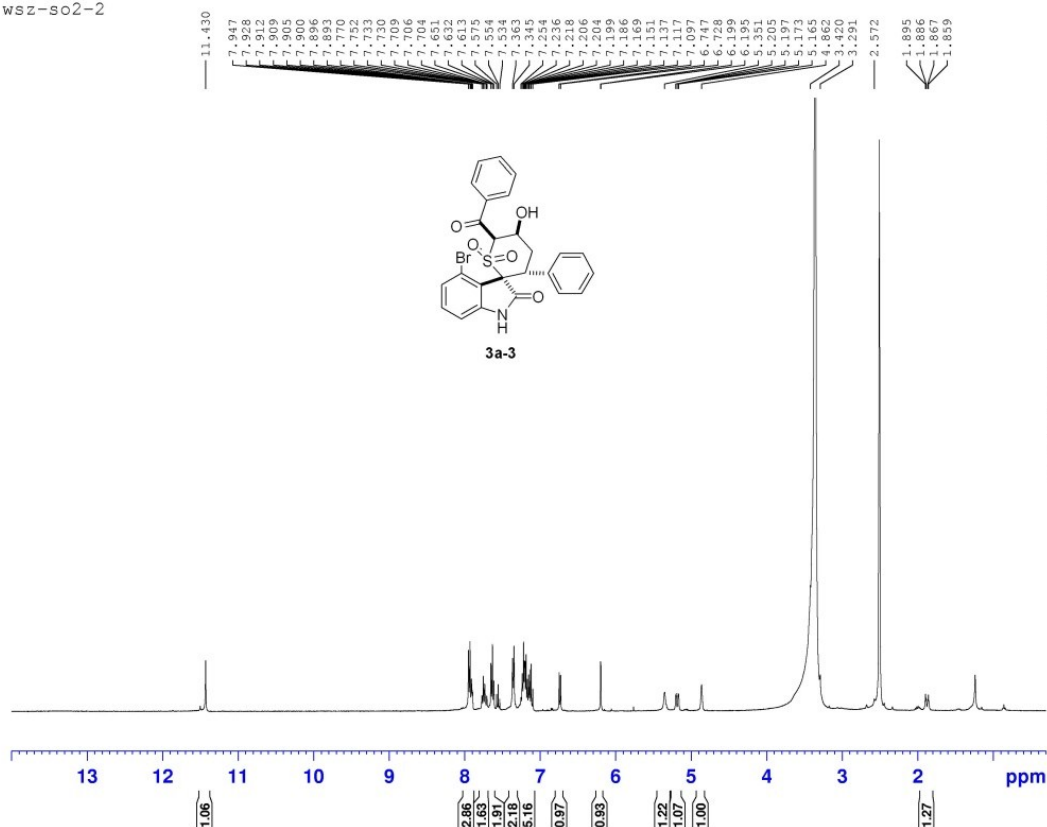

Current Data Parameters  
NAME: wsz-so2-2  
EXPNO: 2  
PROCNO: 1

F2 - Acquisition Parameters  
Date\_: 20170701  
Time: 15:11  
INSTRUM: spect  
PROBHD: 5 mm FANBO BB/  
PULPROG: zg30  
TD: 65536  
SOLVENT: DMSO  
NS: 16  
DS: 2  
SWH: 8223.685 Hz  
FIDRES: 0.125493 Hz  
AQ: 3.9846387 sec  
RG: 95.08  
DM: 60.800 usec  
DE: 6.50 usec  
TE: 296.5 K  
D1: 1.0000000 sec  
TDO: 1

===== CHANNEL f1 =====  
NUC1: 1H  
P1: 10.00 usec  
PLM1: 17.78300095 W  
SFO1: 400.1324710 MHz

F2 - Processing parameters  
SI: 65536  
SF: 400.1300000 MHz  
MCH: SM  
SSB: 0  
LB: 0.30 Hz  
GB: 0  
PC: 1.00

wsz-so2

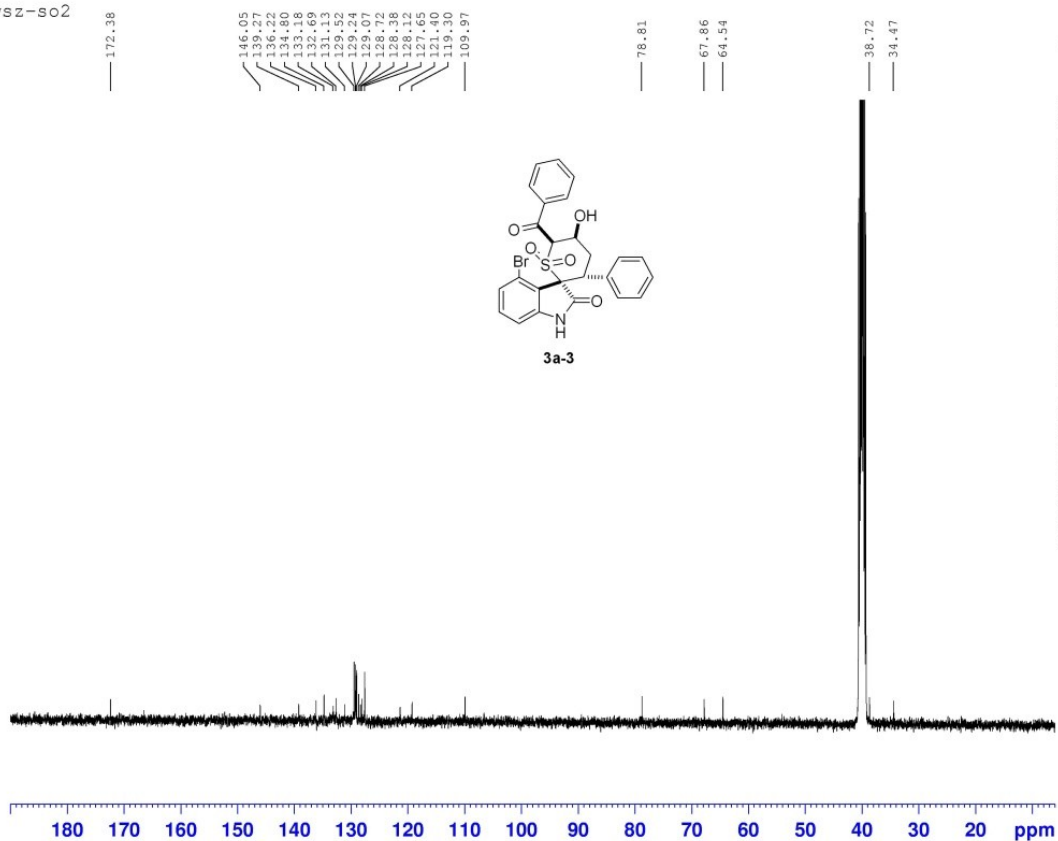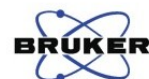

Current Data Parameters  
NAME: wsz-so2  
EXPNO: 3  
PROCNO: 1

F2 - Acquisition Parameters  
Date\_: 20170630  
Time: 13:21  
INSTRUM: spect  
PROBHD: 5 mm FANBO BB/  
PULPROG: zgpg30  
TD: 65536  
SOLVENT: DMSO  
NS: 4096  
DS: 4  
SWH: 24038.461 Hz  
FIDRES: 0.366738 Hz  
AQ: 1.3631388 sec  
RG: 187.8  
DM: 20.800 usec  
DE: 6.50 usec  
TE: 297.6 K  
D1: 2.0000000 sec  
D11: 0.0300000 sec  
TDO: 4

===== CHANNEL f1 =====  
NUC1: 13C  
P1: 10.00 usec  
PLM1: 71.84499869 W  
SFO1: 100.6228293 MHz

===== CHANNEL f2 =====  
CPDPRG2: waltz16  
NUC2: 1H  
PCPD2: 90.00 usec  
PLM2: 17.78300095 W  
PLM12: 0.23136000 M  
PLM13: 0.20360000 M  
SFO2: 400.1316005 MHz

F2 - Processing parameters  
SI: 32768  
SF: 100.6127690 MHz  
MCH: DM  
SSB: 0  
LB: 1.00 Hz  
GB: 0  
PC: 1.40

# HPLC Profile for compound **3a**

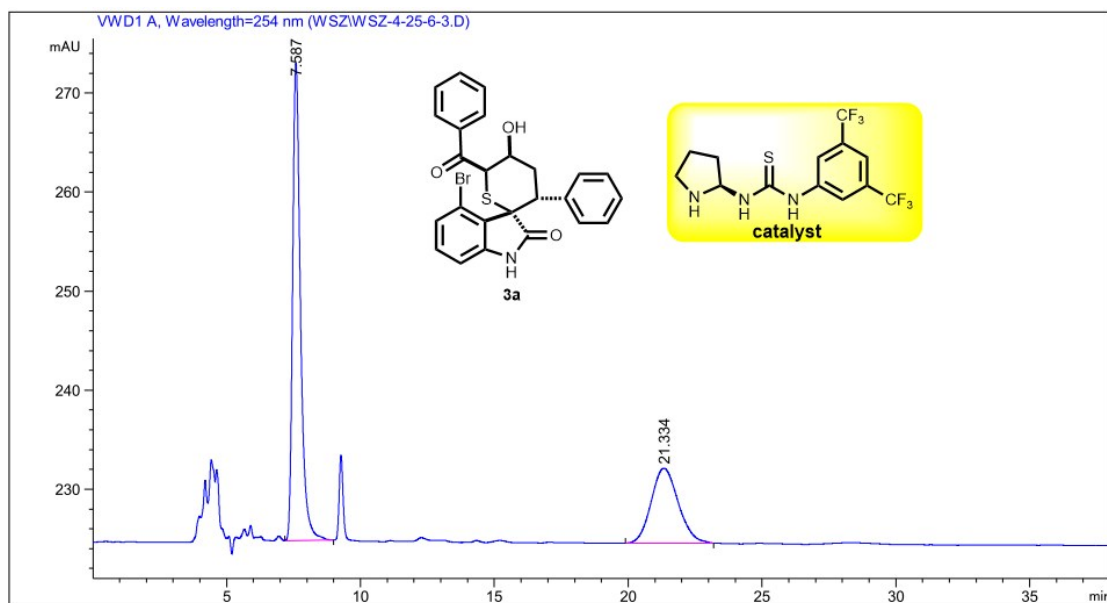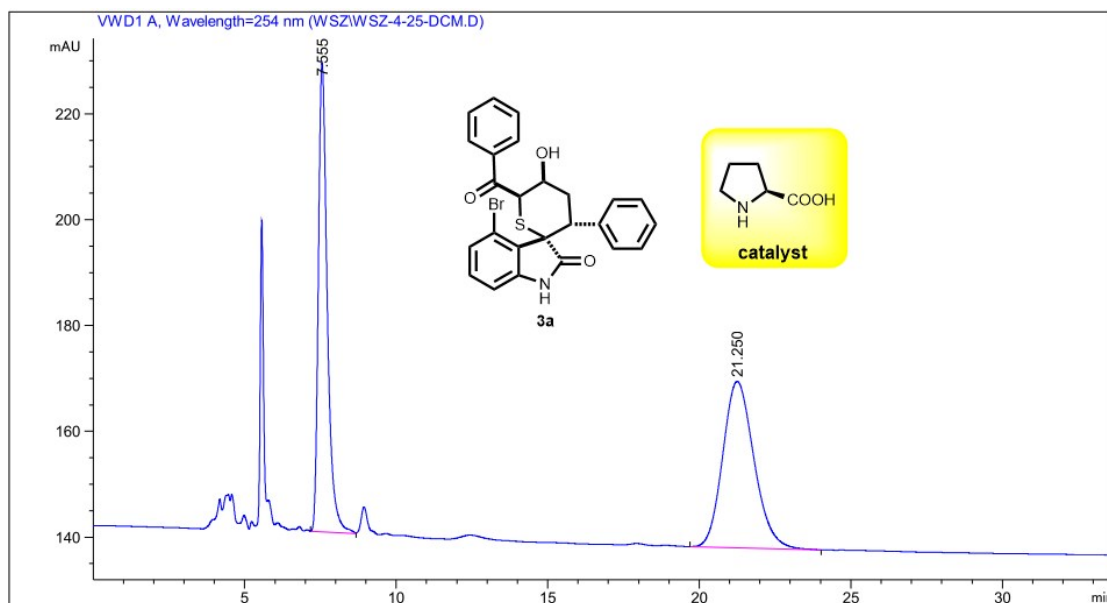

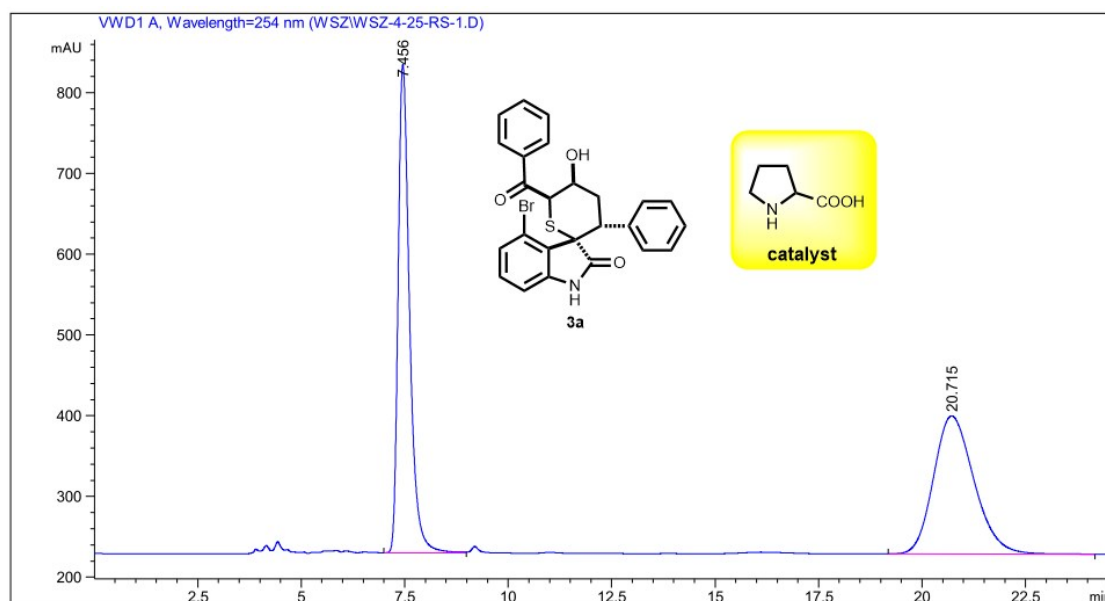

| Peak # | RetTime [min] | Type | Width [min] | Area [mAU*s] | Height [mAU] | Area %  |
|--------|---------------|------|-------------|--------------|--------------|---------|
| 1      | 7.456         | BV   | 0.2908      | 1.16092e4    | 605.19696    | 50.0317 |
| 2      | 20.715        | BB   | 1.0537      | 1.15945e4    | 170.86116    | 49.9683 |

- [1] S. Wang, Z. Guo, S. Chen, Y. Jiang, F. Zhang, X. Liu, W. Chen, C. Sheng, *Chem.-Eur. J.*, **2017**, 23, <https://doi.org/10.1002/chem.201703837>.
- [2] H. Huang, Q. Chen, X. Ku, L. Meng, L. Lin, X. Wang, C. Zhu, Y. Wang, Z. Chen, M. Li, H. Jiang, K. Chen, J. Ding, H. Liu, *J. Med. Chem.* **2010**, 53, 3048-3064.
